1

## 2 **Integrating co-expression networks with GWAS detects genes**

### 3 **driving elemental accumulation in maize seeds**

4

5

6 Robert J. Schaefer<sup>1</sup>, Jean-Michel Michno<sup>1,2</sup>, Joseph Jeffers<sup>3</sup>, Owen Hoekenga<sup>4</sup>, Brian Dilkes<sup>5</sup>,  
7 Ivan Baxter<sup>6,7\*</sup>, Chad L. Myers<sup>1,3\*</sup>

8

9 1. Biomedical Informatics and Computational Biology Graduate Program, University of  
10 Minnesota, Minneapolis, MN, USA

11 2. Department of Agronomy and Plant Genetics, University of Minnesota, St. Paul, MN,  
12 USA

13 3. Department of Computer Science, University of Minnesota, Minneapolis, MN, USA

14 4. Cayuga Genetics Consulting Group LLC, Ithaca, NY, USA

15 5. Department of Biochemistry, Purdue University, West Lafayette, IN, USA

16 6. Donald Danforth Plant Science Center, St. Louis, MO, USA

17 7. USDA-ARS Plant Genetics Research Unit, St. Louis, MO, USA

18

19 \* Corresponding Authors: Ivan Baxter, [ivan.baxter@ars.usda.gov](mailto:ivan.baxter@ars.usda.gov);

20 Chad L. Myers, [cmyers@cs.umn.edu](mailto:cmyers@cs.umn.edu)

21

## 22 **Abstract**

23 Genome-wide association studies (GWAS) have identified thousands of loci linked to hundreds of  
24 traits in many different species. However, for most loci, the causal genes and the cellular processes  
25 they contribute to remain unknown. This problem is especially pronounced in species where  
26 functional annotations are sparse. Given little information about a gene, patterns of expression  
27 are a powerful tool for inferring biological function. Here, we developed a computational  
28 framework called Camoco that integrates loci identified by GWAS with functional information  
29 derived from gene co-expression networks. We built co-expression networks from three distinct  
30 biological contexts and establish the precision of our method with simulated GWAS data. We  
31 applied Camoco to prioritize candidate genes from a large-scale GWAS examining the  
32 accumulation of 17 different elements in maize seeds, demonstrating the need to match GWAS  
33 datasets with co-expression networks derived from the appropriate biological context.  
34 Furthermore, our results show that simply taking the genes closest to significant GWAS loci will  
35 often lead to spurious results, indicating the need for proper functional modeling and a reliable  
36 null distribution when integrating these high-throughput data types. We performed functional  
37 validation on a gene identified by our approach using mutants and annotate other high-priority  
38 candidates with ontological enrichment and curated literature support, resulting in a targeted set  
39 of candidate genes that drive elemental accumulation in maize grain.

40

41

## 42 **Introduction**

43 Genome-wide association studies (GWAS) are a powerful tool for understanding the genetic basis  
44 of trait variation. This approach has been successfully applied for hundreds of important traits in  
45 different species, including important yield-relevant traits in crops. Sufficiently powered GWAS  
46 often identify tens to hundreds of loci containing hundreds of single-nucleotide polymorphisms  
47 (SNPs) associated with a trait of interest(1). In *Zea mays* (maize) alone, GWAS have identified  
48 nearly 40 genetic loci for flowering time(2), 89 loci for plant height(3), 36 loci for leaf length(4),  
49 32 loci for resistance to southern leaf blight(5), and 26 loci for kernel protein(6). Despite an  
50 understanding of the overall genetic architecture and the ability to statistically associate many loci  
51 with a trait of interest, a major challenge has been the identification of causal genes and the  
52 biological interpretation of functional alleles associated with these loci.

53 Linkage disequilibrium (LD), which powers GWAS, acts as a major hurdle limiting the  
54 identification of causal genes. Genetic markers are identified by a GWAS, but often reside outside  
55 annotated gene boundaries(7) and can be relatively far from the actual causal mutation. Thus, a  
56 GWA “hit” can implicate many causal genes at each associated locus. In maize, LD varies between  
57 1 kb and over 1 Mb(8), and this range can be even broader in other crop species(9,10). Moreover,  
58 there is increasing evidence that gene regulatory regions play a significant role in functional  
59 variation, which means that causal variants will never fall within annotated gene boundaries(7,11).  
60 Several quantitative trait loci (QTLs) composed of non-coding sequences have been previously  
61 reported in maize(12–14). These challenging factors mean that even when a variant is strongly  
62 associated with a trait, many plausible candidate genes are equally implicated until a causal  
63 mutation is identified.

64 These issues are multiplied when studying complex traits involving the coordinated effects of  
65 many loci throughout the genome. Narrowing candidates to likely causal genes through prior  
66 knowledge is exacerbated in crop species, where gene annotation is largely incomplete. For  
67 example, in maize, only ~1% of genes have functional annotations based on mutant analyses(15).  
68 Thus, even when a list of potential candidate genes can be identified for a particular trait, there  
69 are very few sources of information that can help identify genes linked to a phenotype. The  
70 interpretation and narrowing of large lists of highly associated SNPs with complex traits are now  
71 the bottleneck in developing new mechanistic understanding of how genes influence traits.

72 Advanced mapping populations developed in crop species have enabled the rapid identification  
73 of hundreds of loci that characterize traits critical to important global issues such as worldwide  
74 food supply and crop nutritional quality, yet we lack the keys to understanding the wealth of  
75 information linking genotypic variation to phenotype, especially when the trait of interest involves  
76 many genes that have interactions that a GWAS cannot explicitly model.

77 One informative and easily measurable source of functional information is gene expression.  
78 Surveying gene expression profiles in different contexts, such as throughout tissue development  
79 or within different genetic backgrounds, helps establish how a gene's expression is linked to its  
80 biological function, including variation in phenotype. Comparing the similarity of two genes'  
81 expression profiles, or co-expression, quantifies the joint response of the genes to various  
82 biological contexts, and highly similar expression profiles can indicate shared regulation and  
83 function(16). Analysis of co-expression or co-expression networks has been used successfully for  
84 identifying functionally related genes, including in several crop species(17–23).

85 Because co-expression provides a global measure of functional relationships, it can serve as a  
86 powerful means for interpreting GWAS candidate loci. Specifically, we expect that variation in  
87 several different genes contributing to the same biological process would be associated with a  
88 given phenotype(24). Thus, if genetic variation driving the phenotype captured by GWAS is  
89 encoded by co-regulated genes, these datasets will non-randomly overlap. Systematic integration  
90 of candidate loci identified by GWAS with co-expression interactions provides an opportunity to  
91 prioritize candidate genes linked to GWAS SNPs based on putative functional information  
92 (captured by a gene co-expression network). Though not all functional relationships are captured  
93 using co-expression(25), these data still provide a highly informative, and sometimes the only, set  
94 of clues about genes that have otherwise not been studied. This principle has been used  
95 successfully with other types of networks, for example, protein-protein interactions(26), and co-  
96 expression has been used as a basis for understanding GWAS in mouse and human(27–29).

97 We developed a freely available, open-source computational framework called Camoco (**Co-**  
98 **analysis of molecular components**) designed specifically for integrating GWAS candidate lists  
99 with gene co-expression networks to prioritize individual candidate genes. Camoco evaluates  
100 candidate SNPs derived from a typical GWAS study, then identifies sets of high-confidence  
101 candidate genes with strong co-expression where multiple members of the set are associated with  
102 the phenotype of interest.

103 We applied this approach to maize, one of the most important agricultural crops in the world,  
104 yielding 15.1 billion bushels of grain in the United States alone in 2016(30). We specifically

105 focused on quantitative phenotypes measuring the accumulation of 17 different elements in the  
106 maize grain ionome (Al, As, B, Ca, Cd, Fe, K, Mg, Mn, Mo, Na, Ni, Rb, S, Se, Sr, and Zn). Plants  
107 must take up all elements except carbon and oxygen from the soil, making the plant ionome a  
108 critical component in understanding plant environmental response(31), grain nutritional  
109 quality(32), and plant physiology(33).

110 We evaluated the utility of three different types of co-expression networks for supporting the  
111 application of Camoco and demonstrate the efficacy of our approach by simulating GWAS to  
112 establish maize-specific SNP-to-gene mapping parameters as well as a robust null model for  
113 GWAS-network overlap. This approach does indeed confirm overlap between functional modules  
114 captured by co-expression networks and GWAS candidate SNPs for the maize grain ionome. We  
115 present high-confidence candidate genes identified for a variety of different ionic traits, test  
116 single gene knockouts demonstrating the utility of this approach, and, more generally, highlight  
117 lessons about the connection between co-expression and GWAS loci from our study that are likely  
118 to generalize to other traits and other species.

## 119 **Results**

### 120 **A framework for integrating GWAS results and co-expression networks**

121 We developed a computational framework called Camoco that integrates the outputs of GWAS  
122 with co-expression networks to prioritize high-confidence causal genes associated with a  
123 phenotype of interest. The rationale for our approach is that genes that function together in a  
124 biological process that are identified by GWAS should also have non-random structure in co-  
125 expression networks that capture the same biological function. Our approach takes, as input, a  
126 list of SNPs associated with a trait of interest and a table of gene expression values and produces,  
127 as output, a list of high-priority candidate genes that are near GWAS peaks having evidence of  
128 strong co-expression.

129 There are three major components of the Camoco framework: a module for SNP-to-gene mapping  
130 (Figure 1A), tools for construction and analysis of co-expression networks (Figure 1B), and an  
131 "overlap" algorithm that integrates GWAS-derived candidate genes with the co-expression  
132 networks to identify high-priority candidate genes with strong co-expression support across  
133 multiple GWAS loci (Figure 1C) (see Materials and Methods for details on each component).

134 The overlap algorithm uses two network scoring metrics: subnetwork density and subnetwork  
135 locality (Eq. 1 and Eq. 2). Subnetwork density measures the average interaction strength between  
136 all pairwise combinations of genes near GWAS peaks. Subnetwork locality measures the

137 proportion of co-expression interactions among genes within a GWAS-derived subnetwork (local  
 138 interactions) as compared to the number of global interactions with other genes in the genome.  
 139 Density and locality were also calculated on a gene-specific basis (Eq. 3 and Eq. 4) (see Materials  
 140 and Methods for details). For a given input GWAS trait and co-expression network, the statistical  
 141 significance for both density and locality is determined by generating a null distribution based on  
 142 randomly generated GWAS traits ( $n = 1,000$ ) with the same number of implicated loci and  
 143 corresponding candidate genes. This null distribution is then used to derive a  $p$ -value for the  
 144 observed subnetwork density and locality for all putative causal genes (Figure 1D). Thus, for a  
 145 given input GWAS trait, Camoco produces a ranked list of candidate causal genes for both network  
 146 metrics and a false discovery rate (FDR) that indicates the significance of the observed overlap  
 147 between each candidate causal gene and the co-expression network. Using this integrated  
 148 approach, the number of candidate genes prioritized for follow-up validation is reduced to those  
 149 that have strong trait association and also are highly co-expressed with other GWAS-associated  
 150 genes. Our method can be applied to any trait and species for which GWAS has been completed  
 151 and sufficient gene expression data exist to construct a co-expression network.

152 Figure 1

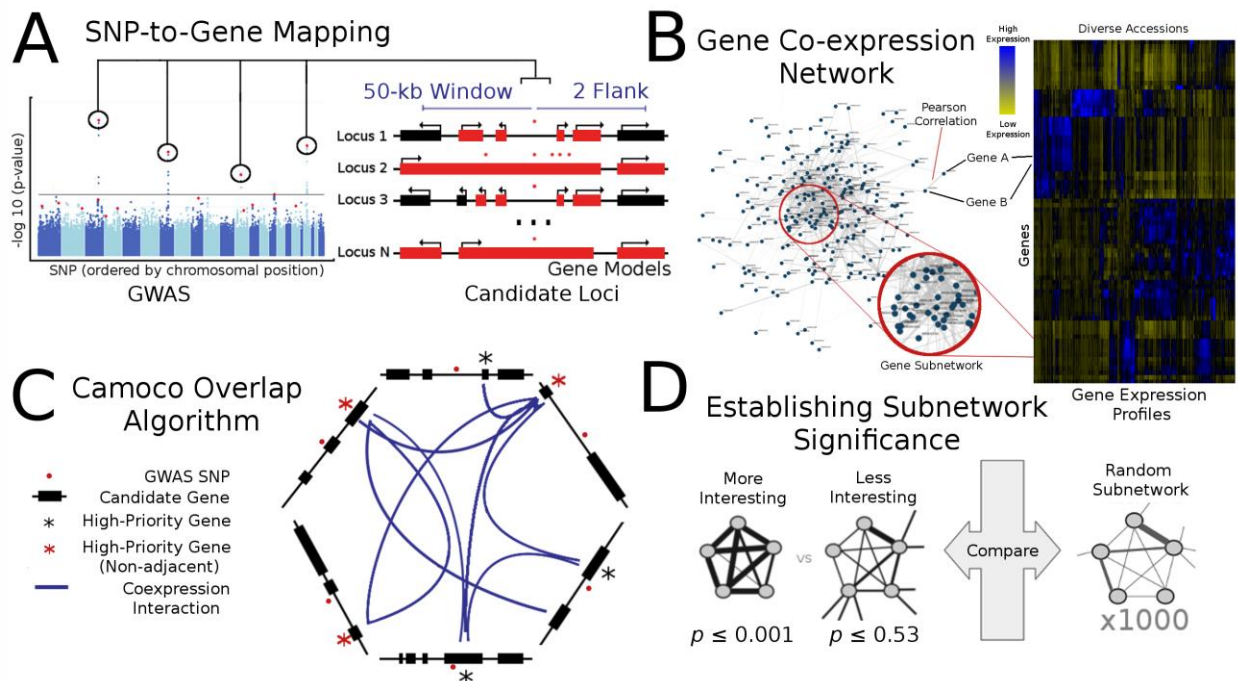

153

154 Schematic of the Camoco framework

155 The Camoco framework integrates genes identified by SNPs associated with  
 156 complex traits with functional information inferred from co-expression

157 networks. **(A)** A typical GWAS result for a complex trait identifies several  
158 SNPs (circled) passing the threshold for genome-wide significance indicating  
159 a multigenic trait. SNP-to-gene mapping windows identify a varying number  
160 of candidate genes for each SNP. Candidate genes are identified based on  
161 user-specified window size and a maximum number of flanking genes  
162 surrounding a SNP (e.g., 50-kb and two flanking genes, designated in red).  
163 **(B)** Independently, gene co-expression networks identify interactions between  
164 genes uncovering an unbiased survey of putative biological co-function.  
165 Network interactions are identified by comparing gene expression profiles  
166 across a diverse set of accessions (e.g., experimental conditions, tissue,  
167 samples). Gene subnetworks indicate sets of genes with strongly correlated  
168 gene expression profiles. **(C)** Co-analysis of co-expression interactions  
169 among GWAS trait candidate genes identifies a small subset of genes with  
170 strong network connections. Blue lines designate genes that have similar co-  
171 expression patterns indicating co-regulation or shared function. Starred genes  
172 are potential candidate genes associated with GWAS traits based on SNP-to-  
173 gene mapping and co-expression evidence. Red stars indicate genes that are  
174 not the closest to the GWAS SNP (non-adjacent) that may have been missed  
175 without co-expression evidence. **(D)** Statistical significance of subnetwork  
176 interactions is assessed by comparing co-expression strength among genes  
177 identified from GWAS datasets to those from random networks containing the  
178 same number of genes. In the illustrated case, the more interesting  
179 subnetwork has both high density as well as locality.

## 180 Generating co-expression networks from diverse transcriptional data

181 A co-expression network that is derived from the biological context generating the phenotypic  
182 variation subjected to GWAS is a key component of our approach. A well matched co-expression  
183 network will describe the most relevant functional relationships and identify coherent subsets of  
184 GWAS-implicated genes. We and others have previously shown that co-expression networks  
185 generated from expression data derived from different contexts capture different functional  
186 information(34,35). For example, experiments measuring changes in gene expression can explore  
187 environmental adaptation, developmental and organ-based variation, or variation in expression  
188 that arises from population and ecological dynamics (see (36) for review). For some species,  
189 published data contain enough experimental accessions to build networks from these different  
190 types of expression experiments (the term accession is used here to differentiate samples, tissues,  
191 conditions, etc.). We reasoned that these different sources of expression profiles likely have a  
192 strong impact on the utility of the co-expression network for interpreting genetic variation

193 captured by GWAS. Using this rationale, we constructed several different co-expression networks  
194 independently and assessed the ability of each to produce high-confidence discoveries using our  
195 Camoco framework.

196 Three co-expression networks representing three different biological contexts were built. The first  
197 dataset targeted expression variation that exists between diverse maize accessions built from  
198 whole-seedling transcriptomes on a panel of 503 diverse inbred lines from a previously published  
199 dataset characterizing the maize pan-genome(37) (called the ZmPAN network hereafter). Briefly,  
200 Hirsch et al. chose these lines to represent major heterotic groups within the United States, sweet  
201 corn, popcorn, and exotic maize lines and measured gene expression profiles for seedling tissue  
202 as a representative tissue for all lines. The second dataset examined gene expression variation  
203 from a previous study characterizing different tissues and developmental time points(38). Whole-  
204 genome RNA-Seq transcriptome profiles from 76 different tissues and developmental time points  
205 from the maize reference accession B73 were used to build a network representing a single-  
206 accession expression map (called the ZmSAM network hereafter). Finally, we created a third  
207 dataset as part of the ionomics GWAS research program. These data measure gene expression  
208 variation in the root, which serves as the primary uptake and delivery system for all the measured  
209 elements. Gene expression was measured from mature roots in a collection of 46 genotypically  
210 diverse maize inbreds (called the ZmRoot network hereafter). All datasets used here were  
211 generated from whole-genome RNA-Seq analysis, although Camoco could also be applied to  
212 microarray-derived expression data.

213 Table 1

|        | Number Significant ( $p \leq 0.01$ ) GO Terms (n = 1078) |           |             |              |
|--------|----------------------------------------------------------|-----------|-------------|--------------|
|        | Density                                                  | Locality  | Both Scores | Either Score |
| ZmPAN  | 451 (41%)                                                | 539 (50%) | 312 (29%)   | 678 (63%)    |
| ZmSAM  | 365 (34%)                                                | 437 (40%) | 234 (21%)   | 568 (53%)    |
| ZmRoot | 573 (53%)                                                | 331 (31%) | 278 (26%)   | 626 (58%)    |

214  
215 Significantly co-expressed GO terms

216 Co-expression was measured among genes within each GO term that had co-  
217 expression data in each network using both density (Eq. 1) and locality (Eq.  
218 2). Significance of co-expression metrics was assessed by comparing values  
219 to 1,000 random gene sets of the same size.

220 Co-expression networks for each dataset were constructed from gene expression matrices using  
221 Camoco (see Materials and Methods for specific details on building these networks). Once built,  
222 several summary statistics were evaluated from interactions that arise from genes in the network



223 (Supp. Fig. 1–3). Co-expression was measured among genes within the same Gene Ontology (GO)  
224 term to establish how well density and locality captured terms with annotated biological  
225 functions.

226 Density and locality were measured for subnetworks consisting of the set of genes co-annotated  
227 to each GO term and compared to scores from 1,000 random sets of genes of the same size (see  
228 Table 1; Supp. Table 1 for full data). In total, 818 GO terms of the 1078 tested (76%) were  
229 composed of gene sets that were significantly co-expressed ( $p \leq 0.01$ ) in at least one network using  
230 density or locality relative to the randomized gene lists of the same size. Broken down by network  
231 as well by co-expression score, there was substantial co-expression among GO terms for both  
232 density and locality in each network. Density was significant for the most GO terms in the ZmRoot  
233 network, while locality performed best in ZmPAN (see Table 1). Considering terms captured by  
234 both scores or by either score, overlap between the two co-expression metrics was comparable. As  
235 previously reported(39), GO terms that exhibit strong co-expression between members often do  
236 so in only a subset of the networks (Supp. Table 1). Thus, both the biological context of the  
237 expression data and nature of the co-expression score influence the subset of GO terms with  
238 significantly co-expression. Overall, while density and locality recover different GO terms, there  
239 are substantially more co-expressed GO terms, for either score, than those found by size-matched  
240 randomly generated sets of genes (Supp. Table 1).

241 Table 2

|        | Network Clusters                   |                                |                                                                      |
|--------|------------------------------------|--------------------------------|----------------------------------------------------------------------|
|        | Num Cluster: ( $10 \geq n > 100$ ) | Num Clusters: ( $n \geq 100$ ) | Num Clusters ( $n \geq 10$ ) Enriched for GO Terms ( $p \leq 0.01$ ) |
| ZmPAN  | 76                                 | 18                             | 71                                                                   |
| ZmSAM  | 160                                | 10                             | 115                                                                  |
| ZmRoot | 150                                | 10                             | 106                                                                  |

243 Gene co-expression network cluster assignments

244 Gene clusters were calculated by running the Markov Cluster (MCL) algorithm  
245 on the co-expression matrix. Cluster values designate network specific gene  
246 clusters and are not compared across networks.

247 In addition to detecting strong co-expression among genes previously annotated by functional  
248 processes, unsupervised network clustering using the Markov Cluster algorithm(40) showed  
249 distinct modules within each network. A large number of clusters were significantly enriched for  
250 genes that are co-annotated for the same GO term (hypergeometric  $p$ -value  $\leq 0.01$ ; Supp. Table  
251 3). Not all clusters identified previously annotated gene sets. Many strongly co-expressed clusters  
252 lacked any previously annotated function (Table 2; Supp. Table 3) potentially identifying novel

253 co-regulated biological processes. Additionally, all networks exhibited a truncated power law  
254 distribution in the number of significant interactions (degree) for genes in the network (Supp. Fig.  
255 1–3), which is typical of biological networks(41).

## 256 Accounting for *cis* gene interactions

257 Camoco integrates GWAS candidates with co-expression interactions by directly assessing the  
258 density or locality of interactions among candidate genes near GWAS SNPs. However, the process  
259 of mapping SNPs to surrounding candidate genes has inherent complications that can strongly  
260 influence subnetwork co-expression calculations. While we assume that the majority of  
261 informative interactions among candidate genes are between GWAS loci, *cis*-regulatory elements  
262 and other factors can lead to co-expression between linked genes and produce skewed  
263 distributions in density and locality calculations, which can in turn bias co-expression statistics.  
264 Identifying significant overlap between GWAS loci and co-expression networks requires a  
265 distinction between co-expression among genes that are in close proximity to one another on a  
266 chromosome (*cis*) compared to those genes that are not (*trans*).

267 To assess the impact of *cis* co-expression, network interactions for genes located on different  
268 chromosome (*trans* interactions) were compared to *cis* interactions for pairs of genes less than  
269 50 kb apart. The distributions of the two groups indicate that *cis* genes are more likely to have a  
270 strong co-expression interaction score than *trans* genes (Figure 2). This bias toward *cis* genes is  
271 especially pronounced for strong positive co-expression, where we observed substantially  
272 stronger enrichment for linked gene pairs compared to *trans* genes (e.g.,  $z$ -score  $\geq 3$ ; see Figure  
273 2 inset).

274 Figure 2

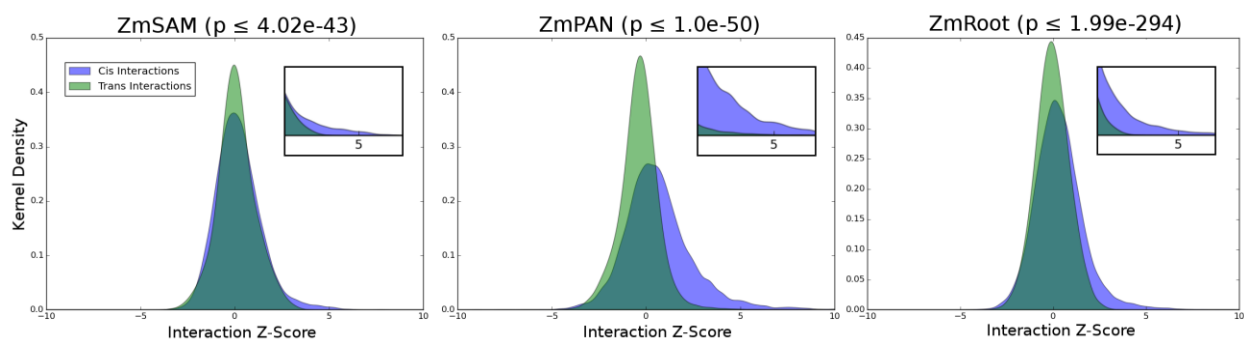

275

## 276 *Cis* vs. *trans* co-expression network interactions

277 Comparing distributions of co-expression network interaction scores between  
278 *cis* and *trans* sets of genes. Distribution densities of *trans* gene pairs (green)  
279 show interactions between genes on separate chromosomes. Distribution

280 densities of *cis* gene pairs (blue) show interactions between genes with less  
281 than 50 kb intergenic distance. Inset figures show z-score values greater than  
282 3. Non-parametric *p*-values were calculated between co-expression values  
283 taken from *cis* and *trans* distributions (Mann-Whitney U test).

284 The enrichment of significant co-expression among *cis* genes, likely due to shared *cis*-regulatory  
285 sequences, prompted us to remove *cis* interactions when examining co-expression relationships  
286 among candidate genes identified by GWAS SNPs in Camoco. To account for possible *cis*  
287 regulation within network metrics described here, only interactions that span different GWAS loci  
288 (*trans*) were included in density and locality calculations for GWAS-network overlap calculation  
289 (see Materials and Methods).

### 290 Evaluation of the Camoco framework

291 To explore the limits of our approach, we examined factors that influence overlap detection  
292 between co-expression networks and genes linked to GWAS loci. In an idealized scenario, SNPs  
293 identified by GWAS map directly to true causal genes, all of which exhibit strong co-expression  
294 network interactions (Figure 3). But in practice, SNPs can affect regulatory sequences or be in  
295 linkage disequilibrium (LD) with the functionally important allele, leading to a large proportion  
296 of SNPs occurring outside of genic regions(7).

297 We evaluated two major challenges that influence SNP-to-gene mapping. The first is the total  
298 number of functionally related genes in a subnetwork, representing the fraction of genes involved  
299 in a biological process, that are simultaneously identified by GWAS. In cases where too few genes  
300 represent any one of the underlying causal processes, our proposed approach is not likely to  
301 perform well—for example, when GWAS identifies a single locus in a ten-gene biological process  
302 due to penetrance, limited allelic variation in the mapping population, or extensive gene-by-  
303 environment interactions. We refer to this source of noise as the *missing candidate gene rate*  
304 (*MCR*) or, in other words, the fraction of genes involved in the causal process not identified by the  
305 GWAS in question (Figure 3B; Eq. 6).

306 The second key challenge in identifying causal genes from GWAS loci is instances where  
307 associated SNPs each implicate a large number of candidate genes. Thus, in cases where the linked  
308 regions are large (i.e., imperfect SNP-to-gene mapping), the framework's ability to confidently  
309 identify subnetworks of highly co-expressed causal genes may be compromised. One would expect  
310 to find scenarios where the proposed approach does not work simply because there are too many  
311 non-causal genes implicated by linkage within each GWAS locus, such that the co-expression  
312 signal among the true causal genes is diminished by the false candidates linked to those regions.

313 We refer to this source of noise as the *false candidate gene rate (FCR)*, the fraction of all genes  
314 linked to GWAS loci that are not causal genes (Figure 3C; Eq. 7).

315 To explore the limits of our co-expression-based approach with respect to these factors, we  
316 simulated scenarios where we could precisely control both MCR and FCR. In practice, neither of  
317 these quantities can be controlled; MCR is a function of the genetic architecture of the phenotype  
318 as well as the degree of power within the study population of interest, and FCR is a function of  
319 recombination frequency in the GWAS population.

320 We evaluated the expected performance of the Camoco framework for a range of each of these  
321 parameters by simulating ideal GWAS scenarios using co-expressed GO terms ( $p \leq 0.05$ ; Table 1).  
322 These ideal cases were then subjected either to a subset of genes being replaced by random genes  
323 (i.e., to simulate MCR but conserve term size) or to functionally unrelated genes being added  
324 using SNP-to-gene mapping (i.e., to simulate FCR introduced by linkage). In both cases,  
325 simulated GWAS candidates (GO term set members) were subjected to varying levels of either  
326 FCR or MCR while tracking the number of GO terms that remained significantly co-expressed at  
327 each level. These simulations enabled us to explore a broad range of settings for these key  
328 parameters and establish whether our proposed approach had the potential to be applied in maize.

329 Figure 3

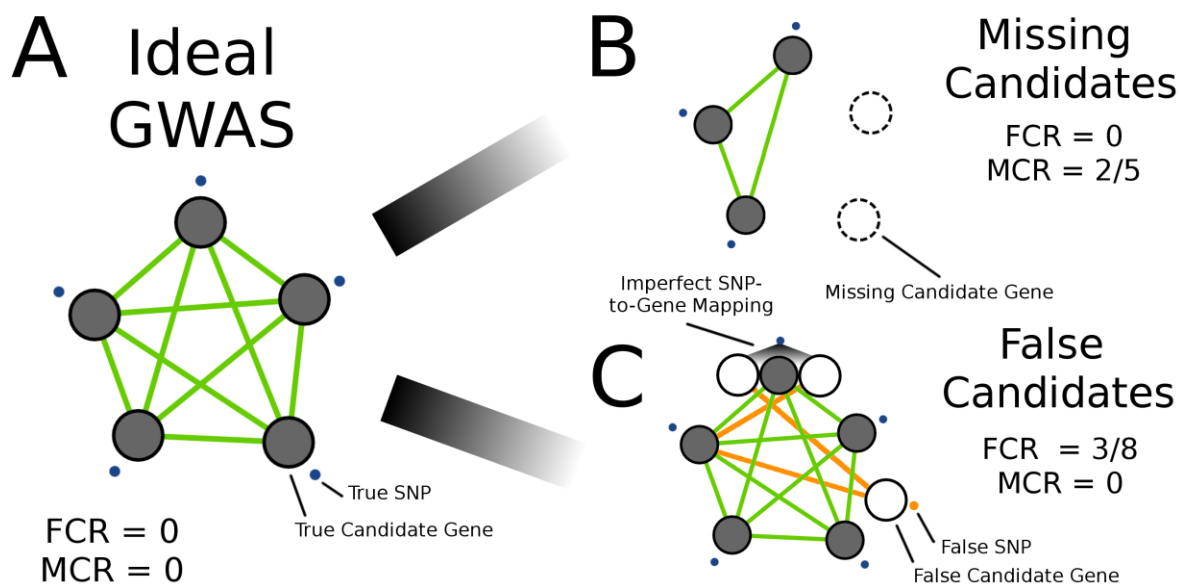

330

331 Simulating GWAS-network overlap using GO terms

332

Several GWAS scenarios were simulated to assess the effect of noise on co-expression network overlap. Panel (A) shows an ideal GWAS, where SNPs

333

334 (blue points) map directly to candidate genes within the same biological  
335 process (i.e., a GO term) and have strong co-expression (green lines). Signal  
336 is defined as the co-expression among the genes exclusive to the GO term.  
337 Noise in the overlap between GWAS and co-expression networks was  
338 introduced by varying two parameters: the missing candidate gene rate (MCR)  
339 and false candidate gene rate (FCR). Panel **(B)** demonstrates the effect of a  
340 large proportion of missing candidate genes (MCR = 2/5) on network signal.  
341 Likewise, panel **(C)** shows the effect of false candidate genes (FCR) on  
342 network overlap, either through false positive GWAS SNPs (orange points) or  
343 through imperfect SNP-to-gene mapping (FCR = 3/8). Orange lines designate  
344 the additional candidate genes that introduce co-expression noise that  
345 impedes the identification of network structure.

346 **Simulated GWAS datasets show robust co-expression signal to MCR and FCR**  
347 Subnetwork density and locality were measured for significantly co-expressed GO terms  
348 containing between 50 and 150 genes in each network at varying levels of MCR (see Supp. Table  
349 4). At each MCR level, density and locality among the remaining genes were compared to 1,000  
350 random sets of genes of the same size. The proportion of initial GO terms that remained  
351 significantly co-expressed was recorded for each network (see Figure 4, red curve; see Supp. Fig.  
352 4A for absolute term numbers). GO terms were also split into two starting groups based on  
353 strength of initial co-expression: moderate ( $0.001 < p \leq 0.05$ ; blue curve) and strong ( $p \leq 0.001$ ;  
354 violet curve).

355 Figure 4

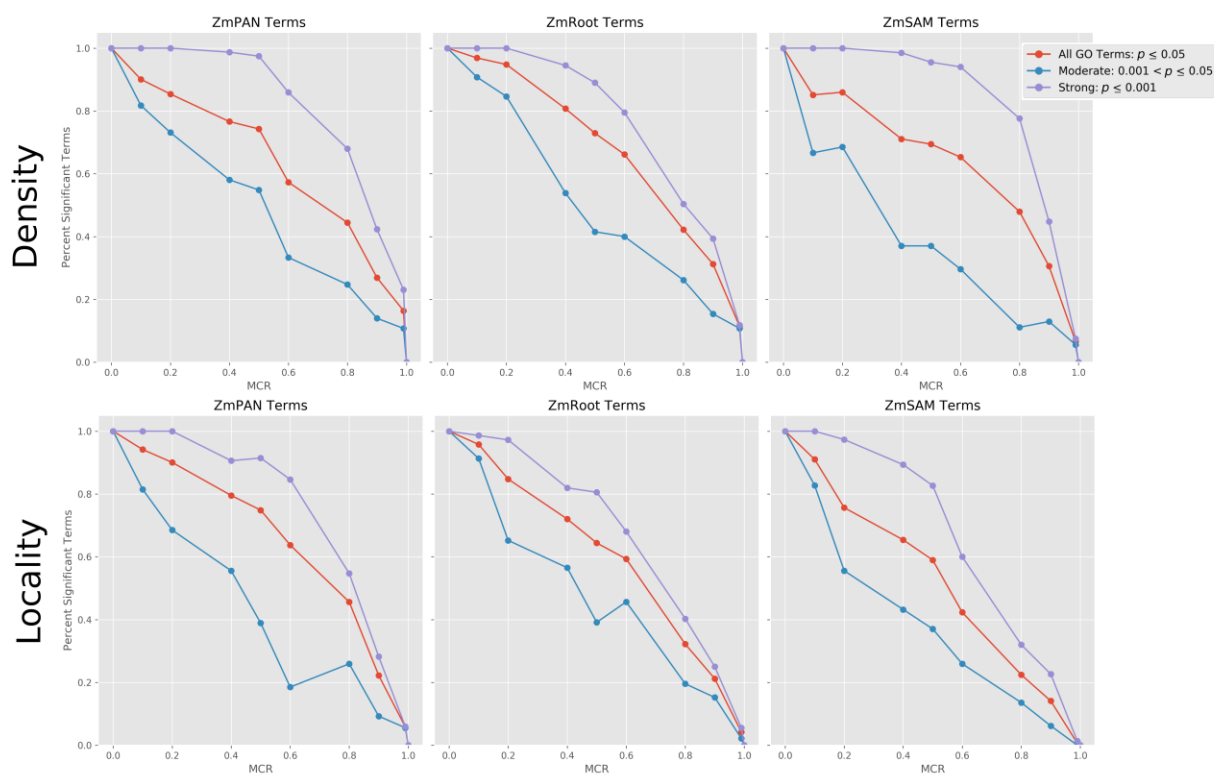

356

357 Strength of co-expression among GO terms at varying levels of MCR

358 Subnetwork density and locality were measured for all GO terms with strong  
359 initial co-expression ( $p \leq 0.05$ ) comparing co-expression in GO terms to 1,000  
360 random networks of the same size. Co-expression density and locality were  
361 then compared again ( $n = 1,000$ ) with varying missing candidate rate (MCR),  
362 where a percentage of genes was removed from the term and replaced with  
363 random genes to conserve GO term size. Curves decline with increased MCR  
364 as the proportion of strongly co-expressed GO terms ( $p \leq 0.05$ ,  $n = 1,000$ )  
365 decreases compared to the initial number of strongly co-expressed terms in  
366 each network (red curve). GO terms in each network were also split into two  
367 subsets based on initial co-expression strength: “strong,” (initial co-  
368 expression  $p \leq 0.001$ ; blue curve), and “moderate,” (initial co-expression  
369  $0.001 < p \leq 0.05$ ; violet curve).

370 As expected, strength of co-expression among GO terms decreased as MCR increased. Figure 4  
371 shows the decay in the proportion of GO terms that exhibit significant co-expression at increasing  
372 levels of MCR (red curve). In general, the decay of signal is similar between density and locality,

373 where signal initially decays slowly until approximately 60% MCR, when signal quickly  
374 diminishes.

375 In all three networks, GO terms with stronger initial co-expression were more robust to MCR.  
376 Signal among strongly co-expressed GO terms ( $p \leq 0.001$ ; violet curve) decayed at a substantially  
377 lower rate than moderately co-expressed GO terms, indicating that this approach is robust for  
378 GWAS datasets with moderate levels of missing genes when co-expression among true candidate  
379 genes is strong. Co-expression signal in relation to MCR was also compared between GO terms  
380 split by the number of genes within the term (see Supp. Fig. 4B–C), which did not influence the  
381 rate at which co-expression signal decayed.

382 Likewise, the effect of FCR was simulated. Significantly co-expressed GO terms of between 50 and  
383 150 genes (MCR = 0) with significant co-expression ( $p \leq 0.05$ ; see Supp. Table 4) were selected.  
384 The nucleotide position of the starting base pair of each true GO term gene was used as input for  
385 our SNP-to-gene mapping protocol for identifying GWAS candidates (see Materials and  
386 Methods). Subnetwork density and locality were calculated for the simulated candidate genes  
387 corresponding to each SNP-to-gene mapping combination, in each network, to evaluate the decay  
388 of co-expression signal as FCR increases (Figure 5).

389 Figure 5

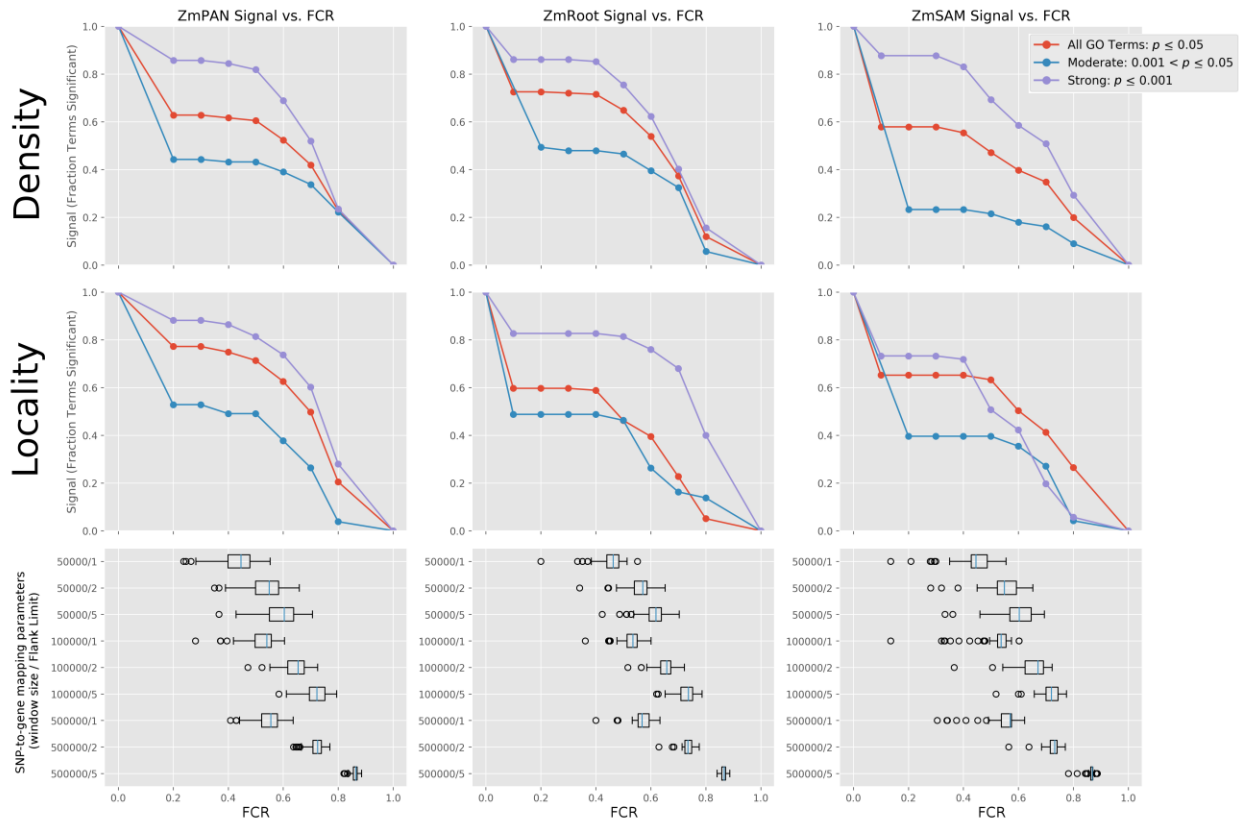

390

391 Simulated GWAS: SNP-to-gene mapping density signal robustness

392 Strongly co-expressed GO terms (density or locality  $p$ -value  $\leq 0.05$ ) were  
 393 used to simulate the effect of FCR on GWAS results. False candidates were  
 394 added to GO terms by including flanking genes near true GO term genes  
 395 according to SNP-to-gene mapping (window) parameters. Box plots show  
 396 effective FCR of GO terms at each SNP-to-gene mapping parameter. Signal  
 397 plots show the proportional number of GO terms that remain significant at  
 398  $\text{FCR} \geq x$  (red curve). GO terms in each network were also split into two  
 399 subsets based on initial co-expression strength: “strong,” (initial co-  
 400 expression  $p \leq 0.001$ ; blue curve), and “moderate,” (initial co-expression  
 401  $0.001 < p \leq 0.05$ ; violet curve).

402 Candidate genes were added by varying the window size for each SNP up to 50 kb, 100 kb, and  
 403 500 kb upstream and downstream and by varying the maximum number of flanking genes on  
 404 each side to one, two, and five. Given the number of additional candidate genes introduced at each  
 405 SNP-to-gene mapping combination, FCR was calculated for each GO term at each window size  
 406 (see Figure 5 box plots).



407 Co-expression signal in relation to FCR was assessed by comparing subnetwork density and  
408 locality in each GO term at different SNP-to-gene mapping parameters for each of the three co-  
409 expression networks to random subnetworks with the same number of genes ( $n = 1,000$ ) (Figure  
410 5, top). The proportion of significantly co-expressed GO terms decayed at higher levels of FCR  
411 (see Supp. Fig. 5A for absolute term numbers). The minimum FCR level for most GO terms was  
412  $\sim 50\%$  as the most stringent SNP-to-gene mapping (50 kb/one flank) approximately doubled the  
413 number of candidate genes. Two additional scenarios were considered in which signal was further  
414 split based on the initial co-expression strength: “moderate” ( $0.001 < p < 0.05$ ; blue curve) and  
415 “strong” ( $p \leq 0.001$ ; violet curve).

416 Despite high initial false candidate rates, co-expression signal among GO terms remained  
417 significant even at 60–70% FCR. Similar to the results with MCR, GO terms with stronger initial  
418 co-expression were more likely to remain significantly co-expressed at higher FCR levels. Co-  
419 expression signal in relation to FCR was also compared between GO terms split by the number of  
420 genes in the term (see Supp. Fig. 5B–C), which did not differentiate the rate at which co-  
421 expression signal decayed.

422 In cases where true candidate genes identified by GWAS were strongly co-expressed, as simulated  
423 here, a substantial number of false positive SNPs or an introduction of false candidate genes  
424 through uncertainty in SNP-to-gene mapping can be tolerated, and network metrics still detected  
425 the underlying co-expressed gene sets using our method. These results indicate that in GWAS  
426 scenarios where the majority of SNPs do not perfectly resolve to candidate genes, systematic  
427 integration with co-expression networks can efficiently filter out false candidates introduced by  
428 SNP-to-gene mapping if the underlying causative loci are strongly co-expressed. Moreover, in  
429 instances where several intervening genes exist between strongly associated SNPs in LD with each  
430 other and the true causative allele, true causal candidates can be detected using co-expression  
431 networks as a functional filter for candidate gene identification.

432 The potential for using this approach, however, is highly dependent on the LD of the organism in  
433 question, the genetic architecture of the trait being studied, and the degree of co-expression  
434 between causative loci. Simulations provide insight into the feasibility of using Camoco to  
435 evaluate overlap between co-expression networks and GWAS as well as a survey of the SNP-to-  
436 gene mapping parameters that should be used when using this approach (see Discussion for more  
437 details). In the context of maize, simulations performed here suggest that systematic integration  
438 of co-expression networks to interpret GWAS results will increase the precision with which causal  
439 genes associated with quantitative traits in true GWAS scenarios can be identified.

440 Prioritizing causal genes driving elemental accumulation in maize grain  
 441 Identifying the biological processes underlying the elemental composition of plant tissues, also  
 442 known as the ionome, can lead to a better understanding of plant adaptation as well as improved  
 443 crops(42). High-throughput analytic approaches such as inductively coupled plasma mass  
 444 spectrometry (ICP-MS) are capable of measuring elemental concentrations for multiple elements  
 445 and are scalable to thousands of accessions per week. Using ICP-MS, we analyzed the  
 446 accumulation of 17 elements in maize kernels described in depth by Ziegler et al.(43). Briefly,  
 447 kernels from the nested association mapping (NAM) population were grown in four geographic  
 448 locations(1). To reduce environmental-specific factors, the SNPs used in this study were from the  
 449 GWAS performed on the all-location models. Approximately 30 million SNPs and small copy-  
 450 number variants were projected onto the association panel and used to perform a GWAS for each  
 451 of the 17 elements. SNPs were tested for significance of association for each trait using resampling  
 452 model inclusion probability(44) (RMIP  $\leq 0.05$ ; see Materials and Methods). Significantly  
 453 associated SNPs were used as input to Camoco to generate candidate genes from the maize filtered  
 454 gene set (FGS;  $n = 39,656$ ) for each element using a range of SNP-to-gene mapping parameters:  
 455 50-kb, 100-kb, and 500-kb windows (up/downstream) limited each to one, two, or five flanking  
 456 genes (up/downstream of SNP; see Figure 1A). In total, 4,243 statistically significant SNPs were  
 457 associated with maize grain ionome traits. Summing the potential candidate genes across all 17  
 458 traits implicates between 5,272 and 22,927 unique genes depending on the SNP-to-gene mapping  
 459 parameters used (between 13% and 57% of the maize FGS, respectively). On average, each trait's  
 460 significantly associated SNPs identified 118 non-overlapping windows across the ten  
 461 chromosomes of maize (i.e., effective loci; see Materials and Methods), and these implicate an  
 462 average of 612 candidate genes per element (Materials and Methods).

463 Table 3

| Name             | GWAS SNPs | Effective Loci |       |       | Candidate Genes |      |       |       |      |       |       |       |       |
|------------------|-----------|----------------|-------|-------|-----------------|------|-------|-------|------|-------|-------|-------|-------|
|                  |           | 50KB           | 100KB | 500KB | 50KB            |      |       | 100KB |      |       | 500KB |       |       |
| WindowSize       | -         | -              | -     | -     | 1               | 2    | 5     | 1     | 2    | 5     | 1     | 2     | 5     |
| FlankLimit       | -         | -              | -     | -     | 1               | 2    | 5     | 1     | 2    | 5     | 1     | 2     | 5     |
| Ionome (Total)   | 4243      | 2279           | 1658  | 456   | 5272            | 7348 | 11612 | 7727  | 9664 | 13614 | 20024 | 20776 | 22927 |
| Al27             | 176       | 149            | 140   | 98    | 239             | 336  | 417   | 350   | 523  | 699   | 804   | 1035  | 1684  |
| As75             | 182       | 151            | 141   | 104   | 228             | 314  | 372   | 339   | 489  | 669   | 740   | 986   | 1657  |
| B11              | 108       | 95             | 86    | 68    | 154             | 233  | 271   | 219   | 326  | 433   | 426   | 601   | 1007  |
| Ca43             | 105       | 82             | 78    | 61    | 124             | 181  | 215   | 164   | 253  | 350   | 339   | 476   | 845   |
| Cd111            | 630       | 471            | 418   | 251   | 869             | 1189 | 1395  | 1252  | 1786 | 2309  | 3159  | 3758  | 5283  |
| Cu65             | 165       | 133            | 125   | 101   | 202             | 293  | 355   | 284   | 437  | 604   | 562   | 805   | 1431  |
| Fe57             | 171       | 136            | 125   | 89    | 252             | 351  | 420   | 335   | 511  | 697   | 766   | 990   | 1546  |
| K39              | 130       | 111            | 100   | 78    | 168             | 248  | 298   | 239   | 357  | 498   | 534   | 715   | 1176  |
| Mg25             | 153       | 129            | 121   | 99    | 203             | 281  | 328   | 274   | 414  | 554   | 584   | 815   | 1398  |
| Mn55             | 168       | 134            | 119   | 94    | 228             | 302  | 340   | 314   | 436  | 562   | 638   | 850   | 1364  |
| Mo98             | 154       | 123            | 109   | 74    | 226             | 312  | 361   | 287   | 419  | 532   | 709   | 892   | 1354  |
| Ni60             | 99        | 73             | 64    | 49    | 107             | 148  | 163   | 161   | 226  | 291   | 301   | 417   | 697   |
| P31              | 123       | 101            | 91    | 70    | 159             | 223  | 260   | 210   | 312  | 424   | 485   | 643   | 1051  |
| Rb85             | 135       | 105            | 93    | 78    | 168             | 223  | 251   | 245   | 335  | 414   | 409   | 590   | 1026  |
| Se82             | 162       | 135            | 129   | 101   | 237             | 328  | 392   | 330   | 485  | 682   | 663   | 895   | 1563  |
| Sr88             | 113       | 99             | 90    | 63    | 142             | 206  | 238   | 199   | 317  | 431   | 481   | 636   | 1009  |
| Zn66             | 149       | 125            | 116   | 90    | 211             | 299  | 348   | 288   | 435  | 565   | 613   | 841   | 1419  |
| Ionome (Average) | 172       | 138            | 126   | 92    | 230             | 322  | 378   | 323   | 474  | 630   | 718   | 938   | 1501  |
|                  |           | 119            |       |       | 613             |      |       |       |      |       |       |       |       |

464

465 Maize grain ionome SNP-to-gene mapping results

466 Significant SNPs associated with the maize grain ionome were mapped to  
467 candidate genes by collapsing SNPs with overlapping windows down to  
468 effective SNPs, then taking genes upstream and downstream of the effective  
469 SNP up to the flank limit.

470 Camoco identifies high-priority candidate causal genes under ionomic GWAS loci

471 Given the large number of candidate genes associated with elemental accumulation, we used  
472 Camoco to integrate network co-expression with effective loci identified by GWAS for each of the  
473 17 elemental traits separately. By combining candidate gene lists with the three gene expression  
474 datasets (ZmPAN, ZmRoot, and ZmSAM) and two co-expression network approaches (locality  
475 and density) high-priority candidate genes driving elemental accumulation in maize were  
476 identified (see Figure 1C). For each network-trait combination, Camoco identified a ranked list of  
477 prioritized candidate causal genes, each associated with an FDR that reflects the significance of  
478 co-expression connecting that candidate gene to genes near other loci associated with the same  
479 trait (Supp. Table 5). We defined a set of high-confidence discoveries by reporting candidates that  
480 were discovered at a  $FDR \leq 30\%$  in at least two SNP-to-gene mapping parameter settings (e.g.,  
481 50 kb/one flank and 100 kb/one flank), denoted as the high-priority overlap (HPO) set (see Supp.  
482 Table 6 and Materials and Methods).

483 Figure 6

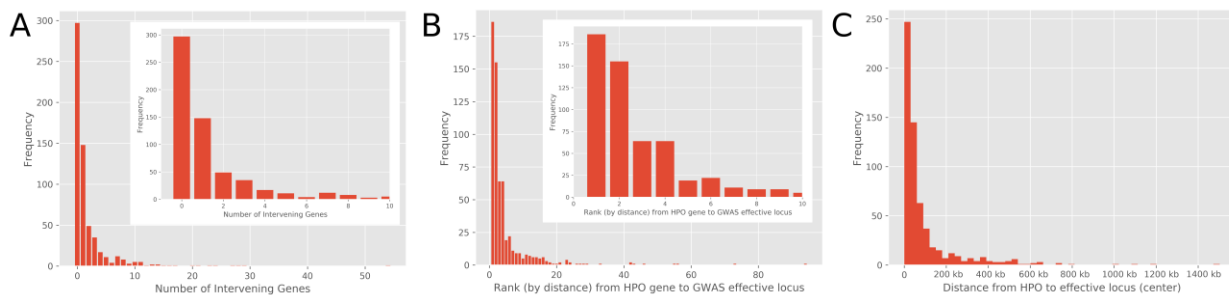

484

485 Number of intervening genes between HPO gene and GWAS locus

486 The distribution of positional candidates and HPO genes. Panel (A) shows the  
487 distribution in the number of positional candidates between each of the 610  
488 HPO genes and an effective locus (note: intervening gene could also be an  
489 HPO gene). Panel (B) shows candidate genes near GWAS SNPs, ranked by  
490 their absolute distance to effective loci. The distribution shows the rank of the  
491 absolute distance (either upstream or downstream) of HPO genes. In both  
492 panels, the inset plot shows the lower end of the distributions. Panel (C)

493 shows the distance between the center of HPO genes and the center of the  
 494 effective locus identified by GWAS.

495 By these criteria, we found strong evidence of co-expression for 610 HPO genes that were  
 496 positional candidates among the 17 ionic traits measured (1.5% maize FGS). The number of  
 497 HPO genes discovered varied significantly across the traits we examined, with between 2 and 209  
 498 HPO genes for a given element considering either density or locality in any network (Table 4;  
 499 Either:Any column). HPO genes discovered by Camoco were often non-adjacent to GWAS  
 500 effective loci, either having genes intervening between the HPO candidate and the effective locus  
 501 or having positional candidates that were closer either upstream or downstream of the GWAS  
 502 locus (Figure 1C). Of the 610 HPO genes, 297 had zero intervening genes (Figure 6A). The  
 503 remaining 313 HPO genes had between 1 and 54 intervening genes, though the majority (292 HPO  
 504 genes) had 10 or fewer intervening genes (Figure 6; inset). Similar results were observed when  
 505 considering candidate genes' absolute distance to the effective locus (Figure 6B), demonstrating  
 506 that Camoco often identifies candidates with strong co-expression evidence that would not have  
 507 been selected by choosing the closest positional candidate.

508 Table 4

| Method Network | FDR 30% |         |        |       |          |       |        |       |      |     |        |
|----------------|---------|---------|--------|-------|----------|-------|--------|-------|------|-----|--------|
|                | Either  | Density |        |       | Locality |       |        |       | Both |     |        |
|                | Any     | ZmPAN   | ZmRoot | ZmSAM | Any      | ZmPAN | ZmRoot | ZmSAM | Any  | Any | ZmRoot |
| Al             | 69      | 0       | 13     | 0     | 13       | 56    | 1      | 0     | 57   | 1   | 0      |
| As             | 28      | 0       | 27     | 0     | 27       | 1     | 1      | 0     | 2    | 1   | 1      |
| B              | 2       | 0       | 0      | 0     | 0        | 0     | 1      | 1     | 2    | 0   | 0      |
| Ca             | 3       | 0       | 0      | 0     | 0        | 0     | 1      | 2     | 3    | 0   | 0      |
| Cd             | 209     | 0       | 126    | 0     | 126      | 97    | 1      | 0     | 98   | 15  | 1      |
| Cu             | 26      | 0       | 26     | 0     | 26       | 0     | 0      | 0     | 0    | 0   | 0      |
| Fe             | 12      | 0       | 11     | 0     | 11       | 0     | 1      | 0     | 1    | 0   | 0      |
| K              | 17      | 0       | 15     | 0     | 15       | 0     | 0      | 2     | 2    | 0   | 0      |
| Mg             | 26      | 0       | 1      | 0     | 1        | 24    | 0      | 1     | 25   | 0   | 0      |
| Mn             | 2       | 0       | 0      | 0     | 0        | 1     | 1      | 0     | 2    | 0   | 0      |
| Mo             | 8       | 0       | 1      | 0     | 1        | 6     | 1      | 0     | 7    | 0   | 0      |
| Ni             | 2       | 0       | 0      | 0     | 0        | 1     | 0      | 1     | 2    | 0   | 0      |
| P              | 18      | 0       | 0      | 16    | 16       | 0     | 3      | 0     | 3    | 1   | 0      |
| Rb             | 52      | 0       | 0      | 52    | 52       | 0     | 0      | 0     | 0    | 0   | 0      |
| Se             | 105     | 0       | 76     | 0     | 76       | 34    | 0      | 1     | 35   | 6   | 0      |
| Sr             | 60      | 0       | 58     | 0     | 58       | 4     | 0      | 0     | 4    | 2   | 0      |
| Zn             | 49      | 0       | 8      | 0     | 8        | 43    | 0      | 0     | 4    | 2   | 0      |
| Ionome         | 610     | 0       | 326    | 66    | 391      | 228   | 11     | 8     | 247  | 26  | 2      |

509  
 510 Maize grain ionome high-priority candidate genes

511 Gene-specific density and locality metrics were compared to ( $n = 1,000$ )  
 512 random sets of genes of the same size to establish a 30% FDR. Genes were  
 513 considered candidates if they were observed at two or more SNP-to-gene  
 514 mappings (i.e., HPO). Candidates in the "Either" column are HPO genes  
 515 discovered by either density or locality in any network. The number of genes

516 discovered for each element is further broken down by co-expression method  
517 (density, locality, both) and by network (ZmPAN, ZmSAM, ZmRoot).  
518 Candidates in the "Both" column were discovered by density and locality in  
519 the same network or in different networks (Any). Note: zero elements had HPO  
520 genes using "Both" methods in the ZmPAN and ZmSAM networks.

521 Co-expression networks derived from variation across genotypically diverse accessions  
522 support stronger candidate gene discoveries

523 The variation in the number of genes discovered by Camoco depended on which co-expression  
524 network was used as the basis for discovery. The ZmRoot co-expression network proved to be the  
525 strongest input, discovering genes for 15 of the 17 elements (absent in Ni and Rb) for a total of 335  
526 HPO genes, ranging from 1 to 126 per trait (Supp. Table 6). In contrast, the ZmSAM network,  
527 which was constructed based on a tissue and developmental expression atlas collected exclusively  
528 from the B73 accession, supported the discovery of candidate genes for only 8 elements (B, Ca, K,  
529 Mg, Ni, P, Rb, and Se) for a total of 74 HPO genes, ranging from 1 to 52 per trait (Supp. Table 6).  
530 The ZmPAN network, which was constructed from whole seedlings (pooled tissue) across 503  
531 different accessions, provided intermediate results, supporting high-confidence candidate  
532 discoveries for 10 elements (Al, As, Cd, Mg, Mn, Mo, Ni, Se, Sr, and Zn) for a total of 228 HPO  
533 genes, ranging from 1 to 97 per trait (Supp. Table 6). The relative strength of the different  
534 networks for discovering candidate causal genes was consistent even at stricter FDR thresholds  
535 (e.g.,  $FDR \leq 0.10$ ; Supp. Table 6).

536 Figure 7

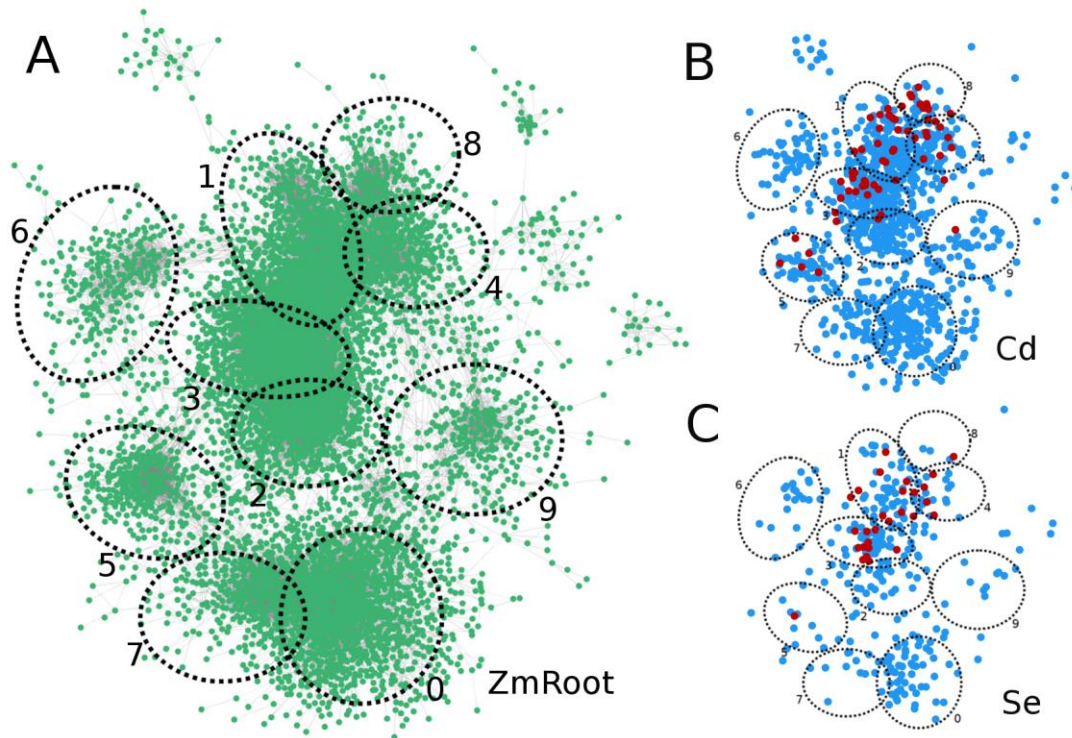

537

538 HPO genes for Cd and Se in the ZmRoot network

539 The strongest 100,000 interactions were used to visualize global clustering of  
540 genes ( $n = 7,844$ ) in the ZmRoot network. A force-directed algorithm  
541 positioned genes (A; green nodes) showing approximate boundaries (dotted  
542 black circles) of the top ten MCL clusters (Supp. Table 2). The ZmRoot  
543 network view was filtered to possible candidate genes (blue nodes) identified  
544 from SNP-to-gene mapping for Cd and Se (B and C, respectively). Network  
545 edges were removed from the visualization in panels (B) and (C), though MCL  
546 cluster boundaries were preserved. HPO genes for each element (highlighted  
547 in red) co-localize to specific clusters.

548 Figure 7 visualizes the discovery process for HPO genes in the ZmRoot network. Genes were  
549 organized in a global view containing the strongest 100,000 interactions using a force-directed  
550 layout algorithm to show high-level clustering (Figure 7A). For two elements, Cd and Se, a large  
551 number of possible candidate genes from SNP-to-gene mapping for each element (Figure 7B–C,  
552 blue nodes) spans many of the MCL clusters identified in the network (dotted ellipses). The HPO  
553 genes, in contrast, discovered by density and locality networks co-localize to a small number of  
554 MCL clusters (red nodes).

## 555 Density and locality network metrics provide complementary information

556 Both density and locality were assessed on a gene-specific level to measure the strength of a given  
557 candidate causal gene's co-expression relationships with genes in other GWAS-identified loci (see  
558 Eq. 3 and Eq. 4). Gene-specific density measures the fraction of observed co-expression  
559 interactions to total possible co-expression relationships between the candidate gene and genes  
560 linked to other GWAS-identified loci, while gene-specific locality normalizes gene interactions to  
561 account for the proportion of interactions between the candidate gene and the rest of the genome  
562 (i.e., genes not near a GWAS locus). Overall, density identified more HPO genes than did locality.  
563 For example, across all traits and networks, 391 HPO candidate genes were discovered using  
564 density, while 247 HPO candidate genes were discovered using locality (see Table 4, Density:Any  
565 and Locality:Any). Interestingly, the high-confidence genes were largely complementary, in terms  
566 of both which traits and which network they produced results for. Among the two sets of genes  
567 (391 and 247 genes, respectively), 26 HPO genes in common were discovered (Table 4: Both:Any).  
568 While this overlap is statistically significant ( $p \leq 1.5e-13$ ; hypergeometric), the large number of  
569 uniquely discovered genes suggests that the two measures capture largely complementary  
570 biological information from co-expression subnetworks. Indeed, when we measured the direct  
571 correlation of gene-specific density and locality measures across several GWAS traits and GO  
572 terms, we observed very weak positive but significant correlations (Supp. Figure 6). Density was  
573 most effective at identifying HPO genes within the GWAS-linked loci when using the ZmRoot  
574 network (326 HPO genes using density vs. 11 HPO gene using locality). Locality provided stronger  
575 results on the ZmPAN network (228 HPO genes using locality and 0 HPO genes using density).  
576 We observed that the utility of the locality metric appeared to be linked to the number of  
577 accessions used to construct the network (Supp. Table 7), suggesting that the differences between  
578 networks in locality may simply reflect the number of accessions used to generate them (see  
579 Discussion).

## 580 Most candidate causal genes are trait specific

581 One important question is the extent to which putative causal genes overlap across different  
582 ionic traits. It is plausible that some mechanisms affecting elemental accumulation are shared  
583 by multiple elements. We compiled the complete set of HPO genes discovered for each element  
584 and assessed overlap across the complete set of 17 elements (Table 5). Most of the discovered HPO  
585 genes are element specific, with relatively little overlap between elements (Table 5). However, a  
586 limited number of element pairs did exhibit statistically significant overlap, including Cd, which  
587 shared significant overlap with seven other elements (Al, Cu, K, Mg, Mo, Se, and Sr), and Se, which  
588 shared significant overlap with three other elements (As, Cd, and Mg), and Mo, which shared

589 significant overlap with two other elements (Al and Cd). These candidate genes represent  
 590 important potential modulators of elemental composition and are particularly worthy of further  
 591 study (Supp. Table 8).

592 Table 5

|    | Al    | As    | B | Ca | Cd    | Cu    | Fe    | K     | Mg    | Mn    | Mo    | Ni | P     | Rb | Se    | Sr | Zn |
|----|-------|-------|---|----|-------|-------|-------|-------|-------|-------|-------|----|-------|----|-------|----|----|
| Al | 69    | 0     | 0 | 0  | 14    | 0     | 1     | 0     | 1     | 0     | 2     | 0  | 0     | 0  | 3     | 0  | 1  |
| As | 1     | 28    | 0 | 0  | 2     | 0     | 0     | 0     | 0     | 0     | 0     | 0  | 0     | 0  | 4     | 0  | 0  |
| B  | 1     | 1     | 2 | 0  | 0     | 0     | 0     | 0     | 0     | 0     | 0     | 0  | 0     | 0  | 0     | 0  | 0  |
| Ca | 1     | 1     | 1 | 3  | 0     | 0     | 0     | 0     | 0     | 0     | 0     | 0  | 0     | 0  | 0     | 0  | 0  |
| Cd | 0     | 0.056 | 1 | 1  | 209   | 6     | 2     | 3     | 4     | 0     | 4     | 0  | 0     | 1  | 12    | 9  | 3  |
| Cu | 1     | 1     | 1 | 1  | 1E-06 | 26    | 0     | 1     | 0     | 0     | 0     | 0  | 0     | 0  | 0     | 2  | 0  |
| Fe | 0.053 | 1     | 1 | 1  | 0.011 | 1     | 12    | 0     | 0     | 0     | 0     | 0  | 0     | 0  | 0     | 1  | 0  |
| K  | 1     | 1     | 1 | 1  | 0.002 | 0.029 | 1     | 17    | 0     | 0     | 0     | 0  | 0     | 0  | 0     | 1  | 0  |
| Mg | 0.112 | 1     | 1 | 1  | 4E-04 | 1     | 1     | 1     | 26    | 0     | 0     | 0  | 0     | 0  | 3     | 2  | 0  |
| Mn | 1     | 1     | 1 | 1  | 1     | 1     | 1     | 1     | 1     | 2     | 0     | 0  | 0     | 0  | 1     | 0  | 0  |
| Mo | 6E-04 | 1     | 1 | 1  | 2E-06 | 1     | 1     | 1     | 1     | 1     | 8     | 0  | 0     | 0  | 1     | 0  | 0  |
| Ni | 1     | 1     | 1 | 1  | 1     | 1     | 1     | 1     | 1     | 1     | 1     | 2  | 0     | 0  | 0     | 0  | 0  |
| P  | 1     | 1     | 1 | 1  | 1     | 1     | 1     | 1     | 1     | 1     | 1     | 1  | 18    | 2  | 0     | 0  | 0  |
| Rb | 1     | 1     | 1 | 1  | 0.514 | 1     | 1     | 1     | 1     | 1     | 1     | 1  | 0.002 | 52 | 0     | 0  | 0  |
| Se | 0.012 | 4E-05 | 1 | 1  | 0     | 1     | 1     | 1     | 7E-04 | 0.014 | 0.054 | 1  | 1     | 1  | 105   | 2  | 3  |
| Sr | 1     | 1     | 1 | 1  | 0     | 0.005 | 0.046 | 0.065 | 0.005 | 1     | 1     | 1  | 1     | 1  | 0.065 | 60 | 0  |
| Zn | 0.2   | 1     | 1 | 1  | 0.03  | 1     | 1     | 1     | 1     | 1     | 1     | 1  | 1     | 1  | 0.005 | 1  | 49 |

593

594 Element HPO candidate gene overlap

595 Overlap between the 610 HPO genes discovered between different elements  
 596 by either density or locality and in any network. The diagonal shows the  
 597 number of HPO genes discovered for each element. Values in the upper  
 598 triangular region (green) show the number of genes that overlap between  
 599 elements. The values in the lower triangle designate the *p*-values  
 600 (hypergeometric) for overlap between the two sets of HPO genes. Red cells  
 601 indicate significance with Bonferroni correction.

602 Enrichment analysis of putative causal genes

603 To explore the broader biological processes represented among HPO genes, we performed GO  
 604 enrichment analysis on the candidate lists, revealing enrichments for five elements (Supp. Table  
 605 9). For example, Sr was enriched for anion transport (GO:0006820;  $p \leq 0.008$ ) and metal ion  
 606 transmembrane transporter activity (GO:0046873;  $p \leq 0.015$ ). Possibly due to insufficient  
 607 functional annotation of the maize genome, these enrichment results were limited, and zero  
 608 elements passed a strict multiple-test correction (Bonferroni). To compensate for the sparsity of  
 609 annotations, we used the HPO gene set discovered for each trait to identify the set of highly  
 610 connected co-expression network neighbors, designated the HPO+ sets. Inclusion in HPO+ was  
 611 determined by a gene's aggregate connectedness to the HPO set (see Materials and Methods). The  
 612 HPO+ sets for several of the ionic traits showed strong GO enrichments, many of which had  
 613 terms that passed strict multiple-test correction, including Al, As, Cd, Cu, Fe, K, P, Se, Sr, and Zn





636 “saccharide metabolism” (P). For example, the “saccharide metabolism” collection of GO term  
637 enrichments was driven by five HPO+ genes for P, one of which was *tgd1* (GRMZM2G044027;  
638 see Supp. Table 10). Mutations in the *Arabidopsis thaliana* ortholog for *tgd1* caused the  
639 accumulation of triacylglycerols and oligogalactolipids and showed a decreased ability to  
640 incorporate phosphatidic acid into galactolipids(46), which may alter P accumulation directly or  
641 via phosphatidic acid signaling(47). TGD1 is an ATP-binding cassette (ABC) transporter known  
642 to transport other substrates, including inorganic and organic cations and anions(48). The *tgd1*  
643 gene was present in the HPO set, and the four other genes were identified as strongly connected  
644 neighbors (HPO+) in the co-expression network. Two genes, GRMZM2G018241 and  
645 GRMZM2G030673, are of unknown function, and the other two, GRMZM2G122277 and  
646 GRMZM2G177631, are involved in cellulose synthesis. We should note that these enriched GO  
647 terms demonstrated idiosyncrasies in automated annotation approaches. Terms related to “blood  
648 coagulation” and “regulation of body fluid levels” were recovered, which were likely due to  
649 annotations translated to maize genes on the basis of protein sequence homology in humans.  
650 While, at face value, these term descriptions are not applicable to plant species, the fact that these  
651 terms contained HPO genes as well as strong network co-expression suggests that annotations  
652 assigned through orthology might be capturing underlying biological signals for which the  
653 accepted name is inappropriate (see Discussion).

654 In general, using co-expression networks to expand the neighborhood of the high-confidence  
655 candidate causal genes and then assessing the entire set for functional coherence through GO  
656 enrichment is a productive strategy for gaining insight into what processes are represented. Yet  
657 this approach is particularly challenging in the annotation-sparse maize genome, where only ~1%  
658 of genes have mutant phenotypes(49). GO terms were too broad or insufficiently described to  
659 distinguish causal genes. However, the terms discovered here contain genes that act in previously  
660 described pathways known to impact elemental traits. With greater confidence that subnetworks  
661 containing HPO genes contained coherent biological information, we refined our analysis by  
662 curating HPO genes for their involvement in specific biological processes, namely, those that are  
663 known or suspected to affect the transport, storage, and utilization of elements.

664 GA-signaling DELLA domain transcription factors influence the ionome of maize  
665 One of the high-confidence candidate genes, which appeared in the HPO sets comparing Cd and  
666 the ZmRoot network, is the gibberellin (GA)-signaling component and DELLA and GRAS domain  
667 transcription factor *dwarf9* (GRMZM2G024973; *d9*(50)). *d9* is one of two DELLA paralogs in the  
668 maize genome, the other being *dwarf8* (GRMZM2G144744; *d8*); both can be mutated to

669 dominant-negative forms that display dwarf phenotypes and dramatic suppression of GA  
670 responses(51). Camoco ranked *d9* among the high-confidence candidates for Cd but not *d8*,  
671 though both are present in the root-based co-expression network (ZmRoot). There was only  
672 moderate, but positive, co-expression between D8 and D9 (ZmRoot:  $z = 1.03$ ; ZmPAN:  $z = 1.04$ ).  
673 Given the indistinguishable phenotypes of the known dominant mutants of *d8* and *d9*, the most  
674 likely explanation for this result is that there was allelic variation for *d9* but not *d8* in the GWAS  
675 panel. Moreover, the GA biosynthetic enzyme ent-kaurene synthase (GRMZM2G093603)  
676 encoding the *dwarf5* locus(52) affected the concentration of seed Cd and appeared among the  
677 HPO genes for Sr in the ZmRoot network. This gene is required for the biosynthesis of bioactive  
678 GA via ent-kaurene, strongly suggesting that GA signaling in the roots shapes the ionome and  
679 alters the accumulation of Cd in seeds, with potential impacts on human health.

680 Figure 9

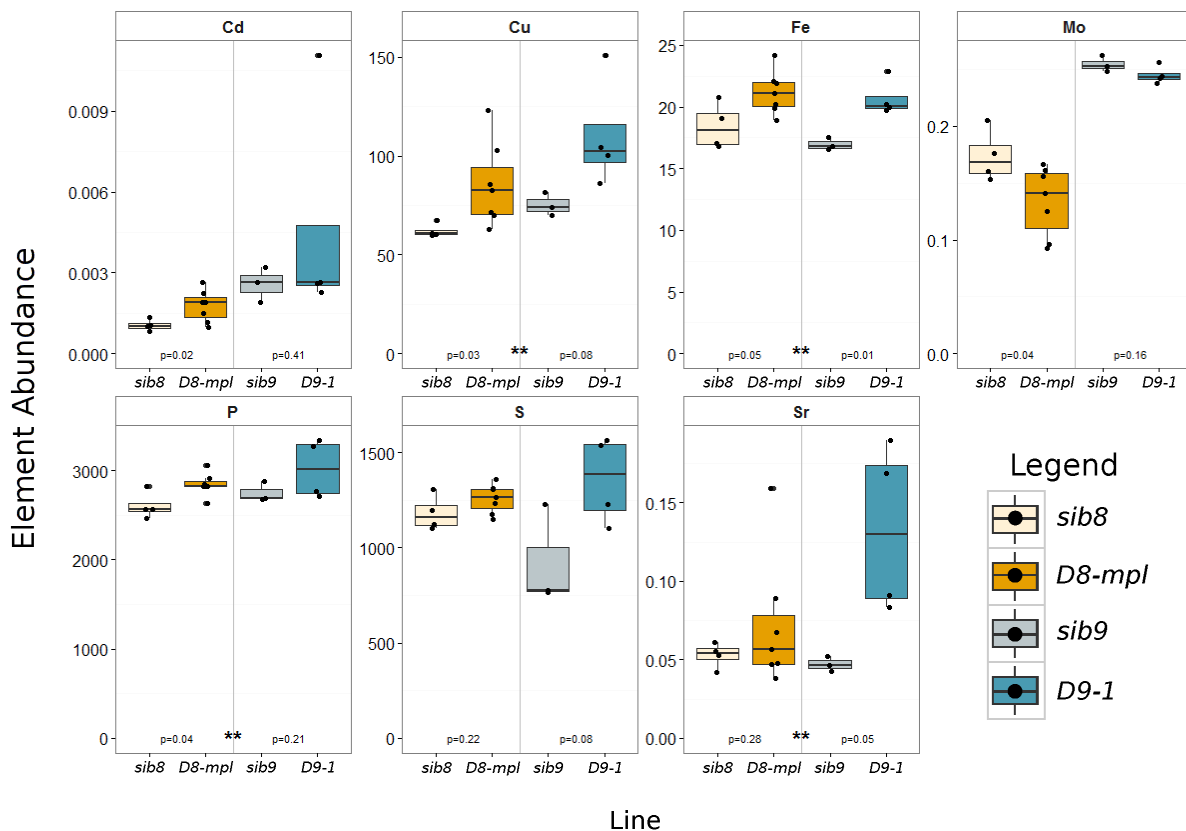

681

682 Ionomic profiles of *D8-mpl* and *D9-1* mutants

683 Box plots displaying ICP-MS values for *D8-mpl* and *D9-1* along with null  
684 segregating siblings (*sib8* and *sib9*). Embedded *p*-values indicate statistical  
685 differences between mutants and wild-type siblings, while asterisks (\*\*)

686 indicate significant differences in a joint analysis between dwarf and wild-  
687 type.

688 To test for an impact of GA signaling on the ionome and provide single-locus tests, we grew the  
689 dominant GA-insensitive mutants *D9-1* and *D8-mpl* and their null segregating siblings (*sib9* and  
690 *sib8*). The dominant *D8-mpl* and *D9-1* alleles have nearly equivalent effects on above-ground  
691 plant growth and similar GA insensitivity phenotypes in the shoots(50). Both mutants were  
692 obtained from the maize genetics co-op and crossed three times to inbred B73 to generate BC2F1  
693 families segregating 1:1 for the dwarf phenotype. Ears from phenotypically dwarf and  
694 phenotypically wild-type siblings were collected and processed for single-seed ionomic profiling  
695 using ICP-MS (Figure 9). Both dwarf lines had significantly different elemental compositions  
696 compared to their wild-type siblings. A joint analysis by *t*-tests between least-squared means  
697 comparing dwarfs and wild-types revealed that Cu, Fe, P, and Sr were higher in the dwarf than  
698 wild-type seeds (designated with two asterisks in Figure 9). Dominant mutants of *d8* are  
699 expressed at lower levels than *d9* in the root but at many fold higher levels in the shoot  
700 (qteller.com(53)). *D8-mpl* was also significantly different from its sibling in Cd and Mo  
701 accumulation. It is possible that *D8-mpl* has a shoot-driven effect on Mo accumulation in the  
702 seed, but we note that previous work(54) identified a large-effect QTL affecting Mo and containing  
703 the *Mot1* gene a mere 22 Mb away from *d8*. As the allele at *Mot1* is unknown in the original *D8-*  
704 *mpl* genetic background, linkage drag carrying a *Mot1* allele cannot be ruled out. This dominant-  
705 negative allele of *D9-1* did not recapitulate the Cd accumulation effect of the linked GWAS QTL  
706 that was the basis for its discovery as a high-confidence candidate gene by Camoco. However, the  
707 *D8-mpl* allele did recapitulate the accumulation effect, and our data demonstrate that both *D8*  
708 and *D9* have broad effects on other ionomic phenotypes.

709 Figure 10

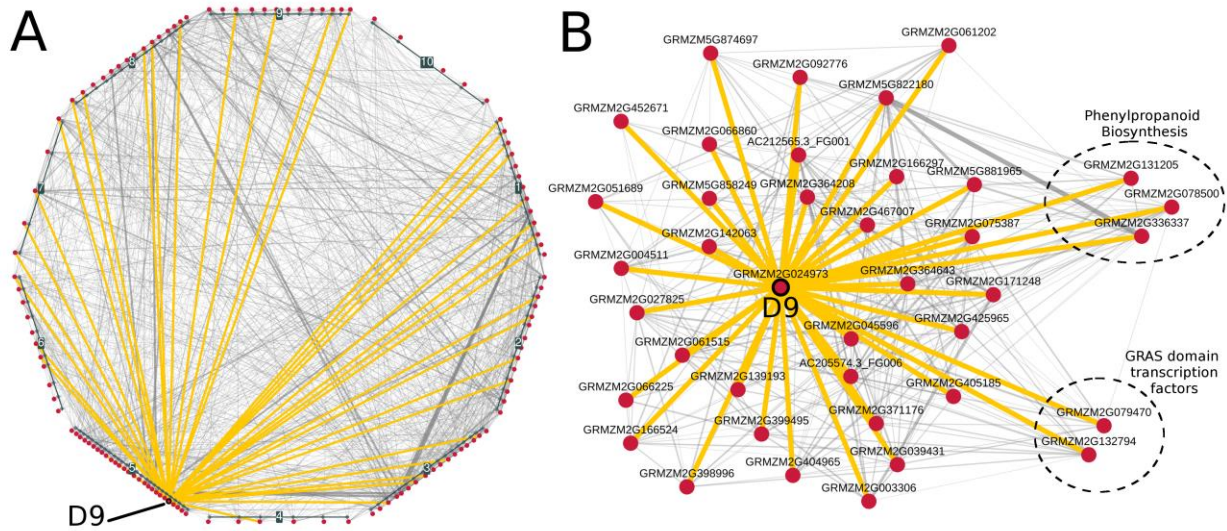

710

711 Co-expression network for D9 and cadmium HPO genes

712 Co-expression interactions among high-priority candidate (HPO) genes were  
713 identified in the ZmRoot network for Cd and visualized at several levels. Panel  
714 **(A)** shows local interactions among the 126 cadmium HPO genes (red nodes).  
715 Genes are grouped and positioned based on chromosomal location.  
716 Interactions among HPO genes and D9 (GRMZM2G024973) are highlighted in  
717 yellow. Panel **(B)** shows a force-directed layout of *D9* with HPO neighbors.  
718 Circled genes show sets of genes with previously known roles in elemental  
719 accumulation.

720 Genes co-expressed with D9 were investigated to determine which were associated with ionic  
721 traits, in particular, seed Cd levels. In the ZmRoot network, D9 had strong co-expression  
722 interactions with 38 other HPO genes (Figure 10A). Among these were the maize Shortroot  
723 paralog (GRMZM2G132794) and a second GRAS domain transcription factor  
724 (GRMZM2G079470). Both of these, as well as the presence of many cell-cycle genes among the  
725 co-expressed genes and ionomics traits affecting genes, raised the possibility that, like in  
726 *Arabidopsis*(55), DELLA-dependent processes, which are responsive to GA, shape the  
727 architecture of the root and the maize ionome. In *Arabidopsis*, DELLA expression disrupts Fe  
728 uptake, and loss of DELLA prevents some Fe-deficiency-mediated root growth suppression. Our  
729 finding that constitutive DELLA activity in the roots results in excess Fe, as determined by the  
730 *D9-1* and *D8-mpl* mutants, points to a conserved role for the DELLA domain transcription factors  
731 and GA signaling for Fe homeostasis in maize, a plant with an entirely different Fe uptake system  
732 than *Arabidopsis*. However, the direction of the effect was opposite to that observed in

733 *Arabidopsis*. Future research into the targets of the DELLA proteins in maize will be required to  
734 further address these differences.

735 Remarkably, the HPO co-expression network associated with D9 in the roots contained three  
736 genes with expected roles in the biosynthesis and polymerization of phenylpropanoids(56). The  
737 genes encoding enzymes that participate in phenylpropanoid biosynthesis, *ccr1*  
738 (GRMZM2G131205), the maize *ligB* paralog (GRMZM2G078500), and a laccase paralog, were  
739 co-expressed with D9 (GRMZM2G336337). The gene, *ligB*, which in angiosperms such as  
740 *Arabidopsis* is only known to be required for the formation of a pioneer specialized metabolite of  
741 no known function, was linked to QTL for multiple ions including Cd, Mn, Zn, and Ni. The gene,  
742 *ccr1*, however, was only in the HPO set for Cd. The *laccase-12* gene (GRMZM2G336337) was also  
743 a multi-ionic hit with linked SNPs affecting Cd, Fe, and P. Genes co-expressed with D9 also  
744 were identified in the ZmPAN network. Consistent with the hypothesis that maize DELLAs  
745 regulated the type II iron uptake mechanism used by grasses, the *nicotianamine synthase3* gene  
746 (GRMZM2G439195, ZmPAN-Cd), which is required for making the type II iron chelators, was  
747 both a Cd GWAS hit and substantially co-expressed with D9 in the ZmPAN network, such that it  
748 contributed to the identification of d9 as an HPO gene for Cd.

749 Camoco identifies GWAS candidates for ion accumulation in maize seeds

750 In addition to the mutant analysis of HPO genes identified by our approach, we manually  
751 examined literature support for the association of candidate genes with ionic traits.  
752 Complementing genes with known roles in elemental homeostasis, HPO gene sets for some  
753 ionic traits included multiple genes encoding known members of the same pathway or protein  
754 complex. This suggests that biological signal was enriched by our novel combination of expression  
755 level polymorphisms and GWAS and provided evidence of novel associations between multiple  
756 pathways and elemental homeostasis.

757 For example, one gene with highly pleiotropic effects on the maize kernel ionome is *sugary1* (*su1*;  
758 GRMZM2G138060)(57). Genetic polymorphisms that affect seed compartment proportions or  
759 the major storage constituents are expected to contribute disproportionately to variation in seed  
760 ionic content. Within the NAM population, functional variation for *su1* can be found in the B73  
761 x IL14H subpopulation. For this reason, six IL14H recombinant inbred lines (RILs) that were still  
762 segregating for the recessive *su1* allele were previously tested for ionic effects(57). This  
763 demonstrated that segregation for a loss of function allele at *su1*, on the cob, affected the levels of  
764 P, S, K, Ca, Mn, Fe, As, Se, and Rb in the seed(57). The *su1* gene was present among the HPO  
765 genes for Se accumulation (Supp. Table 6) based on the root co-expression network (ZmRoot-Se).

766 The *su1* locus was only identified in the HPO set for the element Se, but was linked to significant  
767 NAM GWAS SNPs for the elements P, K, and As. Thus, of the eight elements that were identified  
768 as co-segregating with the *su1* allele in the IL14H RIL population and measured in the NAM panel,  
769 four were associated with *su1* variation in the association panel. It is possible that *su1*, which is  
770 expressed in multiple plant compartments including the roots (qteller.com(53)), might also have  
771 effects throughout the seed ionome beyond a dramatic loss of seed starch. This may result from  
772 coordinate regulation of the encoded isoamylase and other root-expressed determinants of S and  
773 Se metabolism, or from unexpected coordination between root and seed expression networks. The  
774 finding that HPO network neighbors for P were enriched for carbohydrate biosynthetic enzymes  
775 favors the former of these two hypotheses (see Figure 8).

776 Our combined analysis of loci-linked GWAS SNPs and gene co-expression networks identified a  
777 large number of HPO genes associated with Se accumulation. Several genes with known effects  
778 on the ionome, or known to be impacted by the ionome, were identified within this HPO set. For  
779 example, GRMZM2G327406, encodes an adenylyl-sulfate kinase (*adenosine-5'-phosphosulfate*  
780 *[APS] kinase 3*), which is a key component of the sulfur and selenium assimilation pathway and  
781 plays a role in the formation of the substrate for protein and metabolite sulfation (ZmRoot-Se).  
782 At another locus, Camoco identified a cysteine desulfurase (GRMZM2G581155), critical for the  
783 metabolism of sulfur amino acids and the biosynthesis of the 21st amino acid selenocysteine, as  
784 an HPO gene (ZmRoot-Se).

785 Based on the work of Chao et al. in *Arabidopsis*, alterations in cell size and cell division in the root  
786 are expected to have effects on K accumulation in leaves(45). Two of the four subunits of the  
787 polycomb repressive complex 2 (PRC2), known to act on the cell cycle via the retinoblastoma-  
788 related proteins (RBRs), were identified as HPO genes for the K analog Rb. Both *msi1*  
789 (GRMZM2G090217; ZmSAM-Rb) and *fie2* (GRMZM2G148924; ZmSAM-Rb), members of the  
790 PRC2, are co-expressed in the ZmSAM network. The RBR-binding E2F-like transcription factor  
791 encoded by GRMZM2G361659 (ZmSAM-Rb) was also found, a further indication that cell-cycle  
792 regulation via these proteins' interactions could provide a common mechanism for these  
793 associations. Histone deacetylases from the RPD3 family are known to interact with RBR proteins  
794 as well. The RPD3-like *histone deacetylase 2* from maize was identified in the same HPO set  
795 (GRMZM2G136067; ZmSAM-Rb). The *Arabidopsis* homologs of both MSI and this histone  
796 deacetylase have known roles as histone chaperones, and the latter directly binds histone H2B.  
797 Remarkably, *histone H2B* (GRMZM2G401147; ZmSAM-Rb) was also an HPO hit. Lastly, an actin  
798 utilizing SNF2-like *chromatin regulator18* (GRMZM2G126774; ZmSAM-Rb) was identified as yet  
799 another SAM-Rb hit. This mirrors the similar finding of GO enrichment for chromatin regulatory

800 categories in the HPO+ enrichment analysis presented above. Taken together, these demonstrate  
801 a strong enrichment for known protein-protein interactors important for chromatin regulation  
802 and cell-cycle control among the HPO set for the K analog Rb.

803 A number of transporters with known roles in ionome homeostasis were also identified among  
804 the HPO genes. Among these were a P-type ATPase transporter of the ACA P2B subfamily 4  
805 (GRMZM2G140328; ZmRoot-Sr) encoding a homolog of known plasma membrane localized Ca  
806 transporters in multiple species(58), an ABC transporter homolog of the family involved in  
807 organic acid secretion in the roots from the As HPO set (GRMZM2G415529; ZmRoot-As)(59),  
808 and a pyrophosphate energized pump (GRMZM2G090718; ZmPAN-Cd). Several annotated  
809 transporters were identified in the HPO sets for multiple elements: a sulfate transporter  
810 (GRMZM2G444801; ZmRoot-K), a cationic amino acid transporter (AC207755.3\_FG005;  
811 ZmPAN-Cd, ZmPAN-Mo), and an inositol transporter (GRMZM2G142063; ZmRoot-Fe, ZmRoot-  
812 Cd, ZmRoot-Sr).

813 Cadmium is well measured by ICP-MS and affected by substantial genetic variance(43). We  
814 detected the largest number of HPO candidate genes for Cd (209 genes; see Table 4). Among these  
815 were the maize *glossy2* gene (GRMZM2G098239; ZmPAN-Cd), which is responsible for a step in  
816 the biosynthesis of hydrophobic barriers(60). This implicates the biosynthesis and deposition of  
817 hydrophobic molecules in accumulation of ions and may point to root processes, rather than  
818 epicuticular waxes deposition, as the primary mode by which these genes may affect water  
819 dynamics. An ARR1-like gene, GRMZM2G067702, was also an HPO gene associated with Cd  
820 (ZmRoot). Previous work has shown that ARR genes from *Arabidopsis* are expressed in the stele,  
821 where they regulate the activity of HKT1(61). This gene was expressed at the highest level in the  
822 stele at 3 days after sowing.

823 Integrating GWAS data with co-expression networks resulted a set of 610 HPO genes that are  
824 primed for functional validation (1.5% of the maize FGS). The further curated subset of genes  
825 described above all have previously demonstrated roles in elemental accumulation, yet represent  
826 only a small proportion of the HPO genes discovered by Camoco. Functional validation is  
827 expensive and time consuming. Combining data-driven approaches such as network integration  
828 with expert biological curation is an extremely efficient means for the prioritization of genes  
829 driving complex traits like elemental accumulation.



## 830 Discussion

### 831 The effects of linkage disequilibrium

832 Our approach addresses a challenging bottleneck in the process of translating large sets of  
833 statistically associated loci into shorter lists based on a more mechanistic understanding of these  
834 traits. Marker SNPs identified by a GWAS provide an initial lead on a region of interest, but due  
835 to linkage disequilibrium, the candidate region can be quite broad and implicate many potentially  
836 causal genes. In addition to LD, many SNPs identified by GWAS studies lie in regulatory regions  
837 quite far from their target genes(12–14). Previous studies in maize found that while LD decays  
838 rapidly in maize (~1 kb), the variance can be large due to the functional allele segregating in a  
839 small number of lines(7). Additionally, Wallace et al. showed that the causal polymorphism is  
840 likely to reside in regulatory regions, that is, outside of exonic regions.

841 These factors can result in a very large (upward of 57% of all genes here) and ambiguous set of  
842 candidate genes. Until we precisely understand the regulatory landscape in the species being  
843 studied, even the most powerful GWAS will identify polymorphisms that implicate genes many  
844 base pairs away. Here, we find that the large majority of HPO genes were often not the closest  
845 genes to the identified SNPs. These genes would likely not have been identified using the common  
846 approach of prioritizing the genes closest to each marker SNP (Figure 6).

847 A common approach to interpreting such a locus is through manual inspection of the genome  
848 region of interest with a goal of identifying candidate genes whose function is consistent with the  
849 phenotype of interest. This can introduce bias into the discovery process and necessarily ignores  
850 uncharacterized genes. For non-human and non-model species, like maize, this manual approach  
851 is especially ineffective because the large majority of the genome remains functionally  
852 uncharacterized. Camoco leverages the orthogonal use of gene expression data, which can now be  
853 readily collected for most species of interest, to add an unbiased layer of relevant biological  
854 context to the interpretation of GWAS data and the prioritization of potentially causal variants for  
855 further experimental validation. We evaluated our framework under simulated conditions as well  
856 as applied to a large scale GWAS in order to define different co-expression metrics and networks,  
857 biases such as *cis* co-expression, and network parameters needed to be considered in order to  
858 identify co-expression signal.

859 Camoco successfully identified subsets of genes linked to candidate SNPs that also exhibit strong  
860 co-expression with genes near other candidate SNPs. The resulting prioritized gene sets (HPO  
861 genes) reflect groups of co-regulated genes that can potentially be used to infer a broader

862 biological process in which genetic variation affects the phenotype of interest. Indeed, using  
863 Camoco, we found strong evidence for HPO gene sets in 13 of the 17 elemental accumulation  
864 phenotypes we examined (with 5 or more HPO genes). These high-priority sets of genes represent  
865 a small, targeted subset of the candidates implicated by the GWAS for each phenotype (see Supp.  
866 Table 5 and Table 4).

#### 867 Establishing performance expectations of Camoco

868 It is important to note caveats to our approach. For example, phenotypes caused by genetic  
869 variation in a single or small number of genes or, alternatively, caused by a diverse set of otherwise  
870 functionally unrelated genes are not good candidates for our approach. The core assumption  
871 underpinning Camoco is that there are multiple variants in different genes, each driving  
872 phenotypic variation by virtue of their involvement in a common biological. We expect that this  
873 assumption holds for many phenotypes (supported by the fact that we have discovered strong  
874 candidates for the most traits examined), but we expect there are exceptional traits and causal  
875 genes that will violate this assumption. For these traits and genes, Camoco cannot be applied.  
876 Additionally, expression data used to build networks do not fully overlap with genomic data  
877 included in GWAS. For example, of the 39,656 genes in the maize filtered gene set, 11,718 genes  
878 did not pass quality control qualifications and were absent from the three co-expression networks  
879 analyzed here; they thus could not be analyzed despite the possibility there were potentially  
880 significant GWAS SNPs nearby.

#### 881 Camoco-discovered gene sets are as coherent as GO terms

882 In evaluating the expected performance of our approach, we simulated the effect of imperfect  
883 SNP-to-gene mapping by assuming that GO terms were identified by a simulated GWAS trait.  
884 Neighboring genes (encoded nearby on the genome) were added to simulate the scenario where  
885 we could not resolve the causal gene from linked neighboring genes. This analysis was useful, as  
886 it established the boundaries of possibility for our approach, that is, how much noise in terms of  
887 false candidate genes can be tolerated before our approach fails. As described in Figure 5, this  
888 analysis suggests a sensitivity of ~40% using a  $\pm 500$ -kb window to map SNPs to genes (two  
889 flanking genes maximum), or a tolerance of nearly 75% false candidates due to SNP-to-gene  
890 mapping. Therefore, if linkage regions implicated by GWAS extend so far as to include more than  
891 75% false candidates, we would not be likely to discover processes as coherent as GO terms.

892 At the same window/flank parameter setting noted above, we were able to make significant  
893 discoveries (genes with  $FDR \leq 0.30$ ) for 7 of 17 elements (41%) using the density metric in the  
894 ZmRoot network. This success rate is remarkably consistent with what was predicted by our GO

895 simulations at the same window/flanking gene parameter setting. Intriguingly, HPO gene sets  
896 alone were not significantly enriched for GO term genes, indicating that while the HPO gene sets  
897 and GO terms exhibited strikingly similar patterns of gene expression, the gene sets they  
898 described do not significantly overlap. It was not until the HPO gene sets were supplemented with  
899 co-expression neighbors (HPO+) that gene sets exhibited GO term enrichment, though the  
900 resulting terms were not very specific. We speculate that this is due to discovery bias in the GO  
901 annotations that were used for our evaluation, which were largely curated from model species and  
902 assigned to maize through orthology. There are likely a large number of maize-specific processes  
903 and phenotypes that are not yet annotated in ontologies such as GO, yet have strong co-expression  
904 evidence and can be given functional annotations through GWAS.

905 Our analysis shows that loci implicated by ionomic GWAS loci exhibit patterns of co-expression  
906 as strong as many of the maize genes co-annotated to GO terms. Additionally, gene sets identified  
907 by Camoco have strong literature support for being involved in elemental accumulation despite  
908 not exhibiting GO enrichment. Indeed, one of the key motivations of our approach was that crop  
909 genomes like maize have limited species-specific gene ontologies, and this result emphasizes the  
910 extent of this limitation. Where current functional annotations, such as GO, rely highly on  
911 orthology, future curation schemes could rely on species-specific data obtained from GWAS and  
912 co-expression.

913 Beyond highlighting the challenges of a genome lacking precise functional annotation, these  
914 results also suggest an interesting direction for future work. Despite maize genes' limited  
915 ontological annotations, many GWAS have been enabled by powerful mapping populations (e.g.,  
916 NAM(1)). Our results suggest that these sets of loci, combined with a proper mapping to the genes  
917 they represent using co-expression, could serve as a powerful resource for gene function  
918 characterization. Systematic efforts to curate the results from such GWAS using Camoco and  
919 similar tools, then providing public access in convenient forms, would be worthwhile. Maize is  
920 exceptional in this regard due to its excellent genomic tools and powerful mapping populations.  
921 There are several other crop species with rich population genetic resources but limited genome  
922 functional annotation that could also benefit from this approach.

### 923 Co-expression context matters

924 Using our approach, we evaluated 17 ionomic traits for overlap with three different co-expression  
925 networks. Two of the co-expression networks were generated from gene expression profiles  
926 collected across a diverse set of individuals (ZmRoot, ZmPAN) and performed substantially better  
927 than the ZmSAM network, which was based on a large collection of expression profiles across

928 different tissues and developmental stages derived from a single reference line (B73). We  
929 emphasize that this result is not a reflection of the data quality or even the general utility of the  
930 co-expression network used to derive the tissue/developmental atlas. Evaluations of this network  
931 showed a similar level of enrichment for co-expression relationships among genes involved in the  
932 same biological processes (Table 1) and had very similar network structure (Table 2). Instead, our  
933 results indicate that the underlying processes driving genotypic variation associated with traits  
934 captured by GWAS are better captured by transcriptional variation observed across genetically  
935 diverse individuals. Indeed, despite networks having similar levels of GO term enrichment (Table  
936 1), the actual GO terms that drove that enrichment are quite different (Supp. Table 1), which is  
937 consistent with our previous analysis demonstrating that the experimental context of co-  
938 expression networks strongly influences which biological processes it captures(34).

939 Between the two co-expression networks based on expression variation across genotypically  
940 diverse individuals, we also observed differences depending on which tissues were profiled. Our  
941 co-expression network derived from sampling of root tissue across a diverse set of individuals  
942 (ZmRoot) provided the best performance at the FDR we analyzed (Table 4), producing a total of  
943 335 (326 from density and 11 from locality, 2 in both) HPO candidate genes as compared to 228  
944 (all from locality) HPO candidate genes produced by the ZmPAN network, which was derived  
945 from expression profiles of whole seedlings. This result affirms our original motivation for  
946 collecting tissue-specific gene expression profiles: we expected that processes occurring in the  
947 roots would be central to elemental accumulation phenotypes, which were measured in kernels.  
948 However, the difference between the performance of these two networks was modest and much  
949 less significant than the difference between the developmental/tissue atlas-derived network and  
950 the diverse genotype-derived network. Furthermore, we expect neither the ZmRoot nor the  
951 ZmPAN network to fully describe elemental accumulation processes. While ions are initially  
952 acquired from the soil via the root system, we do not directly observe their accumulation in the  
953 seed. The datasets presented here could be further complemented by additional tissue-specific  
954 data, such as genotypically diverse seed or leaf networks.

955 The performance of the ZmRoot versus the ZmPAN network was also quite different depending  
956 on which network metric we used. Specifically, HPO gene discovery in the ZmRoot network was  
957 driven by the density metric, while performance of the ZmPAN network relied on the locality  
958 metric (Table 4). However, locality and density were positively correlated in both networks (Supp.  
959 Figure 6), implying that these two metrics are likely complementary. Indeed, this relationship was  
960 also seen for density and locality of GO terms. Table 1 shows that both metrics had similar overall  
961 performance, each capturing ~40% of GO terms in each network; however, only ~25% was

962 captured by both metrics, indicating that there are certain biological processes where one metric  
963 is more appropriate than the other. In addition to the tissue source differing between the ZmRoot  
964 and ZmPAN networks, the number of experimental accessions drastically differed as well (503  
965 accessions in ZmPAN and 48 in ZmRoot), and this influenced the performance of network  
966 metrics. We showed that locality was sensitive to the number of accessions used to calculate co-  
967 expression (Supp. Table 7) and thus could explain the bias between network metrics and the  
968 number of input accessions. This result also suggests that the 46 accessions in ZmRoot did not  
969 saturate this approach for co-expression signal and that expanding the ZmRoot dataset to include  
970 503 accessions would result in greater power to detect overlap and the identification of more true  
971 positives using locality.

972 In general, our results strongly suggest that co-expression networks derived from expression  
973 experiments profiling genetically diverse individuals, as opposed to deep expression atlases  
974 derived from a single reference genotype, will be more powerful for interpreting candidate genetic  
975 loci identified in a GWAS. Furthermore, our findings suggest that where it is possible to identify  
976 relevant tissues for a phenotype of interest, tissue-specific expression profiling across genetically  
977 diverse individuals is an effective strategy. Identifying the best co-expression context for a given  
978 GWAS has important implications for data generation efforts in future studies.

## 979 **Conclusion**

980 We developed a tool, Camoco, which integrates co-expression networks with GWAS data in order  
981 to better identify functionally relevant causal variants. We used Camoco to examine loci  
982 associated with elemental accumulation in maize grain. To do this, we built three different co-  
983 expression networks and simulated their ability to detect co-expression using GO terms. We then  
984 used these networks to identify patterns of co-expression in a set of GWAS traits measuring seed  
985 accumulation for 17 different elements, resulting in the discovery of 610 high-confidence  
986 candidate causal genes. These candidate gene sets were enriched for bioprocesses related to the  
987 ionome. Although the large majority of the high-confidence candidate genes are uncharacterized  
988 and worth further study, we did find linkage between ionic traits and alleles at genes that have  
989 previously been demonstrated to affect the plant ionome. We validated our approach using genes  
990 and pathways not previously demonstrated to affect the ionome in maize and demonstrated that  
991 GA signaling through the DELLA domain transcription factors broadly impacted the plants'  
992 elemental profiles. Our approach successfully prioritizes causal genes underlying GWAS-  
993 identified loci based solely on gene expression data and establishes a basis for functional  
994 interpretation of otherwise uncharacterized genes associated with complex traits.

## 995 **Materials and Methods**

### 996 Software implementation of Camoco

997 Camoco (Co-analysis of molecular components) is a python library that includes a suite of  
998 command line tools to inter-relate and co-analyze different layers of genomic data. Specifically, it  
999 integrates genes present near GWAS loci with functional information derived from gene co-  
1000 expression networks. Camoco was developed to build and analyze co-expression networks from  
1001 gene transcript expression data (i.e., RNA-Seq), but it can also be utilized on other expression  
1002 data such as metabolite, protein abundance, or microarray data.

1003 This software implements three main routines: (1) construction and validation of co-expression  
1004 networks from a counts or abundance matrix, (2) mapping SNPs (or other loci) to genes, and (3)  
1005 an algorithm that assesses the *overlap* of co-expression among candidate genes near significant  
1006 GWAS peaks.

1007 Camoco is open source and freely available under the terms of the MIT license. Full source code,  
1008 software examples, as well as instructions on how to install and run Camoco are available at  
1009 <http://github.com/schae234/Camoco>. Camoco version 0.5.0 (DOI:10.5281/zenodo.1049133)  
1010 was used for this article.

### 1011 Construction quality control of co-expression networks

#### 1012 Camoco Parameters

1013 All networks were built (using the CLI) with the following Camoco QC parameters:

- 1014 • `min_expr_level`: 0.001 (expression [FPKM] below this is set to NaN)
- 1015 • `max_gene_missing_data`: 0.3 (genes missing expression data more than this percent were  
1016 removed from analysis)
- 1017 • `max_accession_missing_data`: 0.08 (Accessions missing expression data in more than this  
1018 percent were removed from analysis)
- 1019 • `min_single_sample_expr`: 1.0 (genes must have at least this amount of expression  
1020 [FPKM] in one accession)

### 1021 ZmPAN: A genotypically diverse, PAN genome co-expression network

1022 Camoco was used to process the fragments per kilobase per million reads (FPKM) table reported  
1023 by Hirsh et al. and to build a co-expression network. The raw gene expression data were passed  
1024 through the quality control pipeline in Camoco. After QC, 24,756 genes were used to build the  
1025 network. For each pairwise combination of genes, a Pearson correlation coefficient (PCC) was

1026 calculated across FPKM profiles to produce ~306 million network edge scores (Supp. Fig. 1A),  
1027 which were then mean centered and standard normalized (z-score hereafter) to allow cross  
1028 network comparison (Supp. Fig. 1B). A global significance threshold of  $z \geq 3$  was set on co-  
1029 expression interactions in order to calculate gene degree and other conventional network  
1030 measures.

1031 To assess overall network health, several approaches were taken. First, the z-scores of edges  
1032 between genes co-annotated in the maize gene ontology (GO) terms were compared to edges in  
1033 1,000 random terms containing the same number genes. Supp. Fig. 1C shows the distribution of  
1034 *p*-values compared to empirical z-score of edges within a GO term. With a nominal *p*-value cutoff  
1035 of 0.05, the PAN co-expression network had 11.9-fold more GO terms than expected with  $p \leq 0.05$ ,  
1036 suggesting that edges within this co-expression network capture meaningful biological variation.  
1037 Degree distribution is also as expected within the network. Supp. Fig. 1D shows empirical degree  
1038 distributions compared to the power law, exponential, and truncated power law distributions.  
1039 Typically, the degree distributions of biological networks are best fit by a truncated power law  
1040 distribution, which is consistent with the ZmPAN genome co-expression network(41).

#### 1041 ZmSAM: A maize single accession map co-expression network

1042 Publicly available gene expression data were generated from Stelpflug et al(38). In total, 22,691  
1043 genes passed quality control metrics. Similar to the ZmPAN network described above, gene  
1044 interactions were calculated between each pairwise combination of genes to produce ~257 million  
1045 network edges. A global significance threshold of  $z \geq 3$  was set on co-expression interactions in  
1046 order to differentiate significantly co-expressed gene pairs.

1047 Supp. Fig. 2A shows the distribution of edge scores before they were mean centered and standard  
1048 normalized (Supp. Fig. 2B). The ZmSAM network shows a 10.8-fold enrichment for strong edge  
1049 scores ( $p \leq 0.05$ ) between genes annotated to the same GO terms (Supp. Fig. 2C). A final network  
1050 health check shows that the empirical degree distribution of the ZmSAM network is consistent  
1051 with previously characterized biological networks (Supp. Fig. 2D).

#### 1052 ZmRoot: A genotypically diverse maize root co-expression network

1053 Root RNA was extracted and sequenced from 48 diverse maize lines using TruSeq Stranded RNA  
1054 Library Prep and Illumina HiSeq 100-bp paired-end RNA sequencing (RNA-Seq) reads. Raw  
1055 reads were deposited into the short read archive (SRA) under project number PRJNA304663.  
1056 Raw reads were passed through quality control using the program AdapterRemoval(62), which  
1057 collapses overlapping reads into high-quality single reads while also trimming residual PCR

1058 adapters. Reads were then mapped to the maize 5b reference genome using BWA(63,64), PCR  
1059 duplicates were detected and removed, and then realignment was performed across detected  
1060 insertions and deletions, resulting in between 14 and 30 million high-quality, unique nuclear  
1061 reads per accession. Two accessions were dropped due to low coverage, bringing the total number  
1062 to 46.

1063 Quantification of gene expression levels into FPKM was done using a modified version of HTSeq  
1064 that quantifies both paired- and unpaired-end reads(65), available at  
1065 <http://github.com/schae234/MixedHTSeq>. Raw FPKM tables were imported into Camoco and  
1066 passed through the quality control pipeline. After QC steps, 25,260 genes were included in co-  
1067 expression network construction containing ~319 million interactions. Supp. Fig. 3A shows raw  
1068 PCC scores, while Supp. Fig. 3B shows z-scores after standard normal transformation. Similar to  
1069 ZmPAN and ZmSAM, co-expression among GO terms was compared to random gene sets of the  
1070 same size as GO terms (1,000 instances) showing a 13.5-fold enrichment for significantly co-  
1071 expressed GO terms (Supp. Fig. 3C). The degree distribution of the ZmRoot network closely  
1072 follows a truncated power law similar to the other networks built here (Supp. Fig. 3D).

### 1073 SNP-to-gene mapping and effective loci

1074 Two parameters are used during SNP-to-gene mapping: candidate window size and maximum  
1075 number of flanking genes. Windows were calculated both upstream and downstream of input  
1076 SNPs. SNPs having overlapping windows were collapsed down into *effective loci* containing the  
1077 contiguous genomic intervals of all overlapping SNPs, including windows both upstream and  
1078 downstream of the effective locus' flanking SNPs (e.g., locus 2 in Figure 1A). Effective loci were  
1079 cross referenced with the maize 5b functional gene set (FGS) genome feature format (GFF) file  
1080 ([http://ftp.maizesequence.org/release-5b/filtered-set/ZmB73\\_5b\\_FGS.gff.gz](http://ftp.maizesequence.org/release-5b/filtered-set/ZmB73_5b_FGS.gff.gz)) to convert  
1081 effective loci to candidate gene sets containing all candidate genes within the interval of the  
1082 effective SNP and also including up to a certain number of flanking genes both upstream and  
1083 downstream from the effective SNP. For each candidate gene identified by an effective locus, the  
1084 number of intervening genes was calculated from the middle of the candidate gene to the middle  
1085 of the effective locus. Candidate genes were ranked by the absolute value of their distance to the  
1086 center of their parental effective locus. Algorithms implementing SNP-to-gene mapping used here  
1087 are accessible through the Camoco command line interface.

### 1088 Calculating subnetwork density and locality

1089 Co-expression was measured among candidate genes using two metrics: density and locality.  
1090 Subnetwork *density* is based off a z-score statistic and is formulated as the average interaction



1091 strength between *all* (un-thresholded) pairwise combinations of input genes, normalized for the  
1092 total number of input gene pairs:

1093 Eq. 1

$$1094 \quad \text{Subnetwork Density} = \frac{\bar{X} - E(X)}{\sigma(X)/\sqrt{N}}$$

1095 where  $\bar{X}$  is the calculated, mean subnetwork interaction score and  $N$  is  
1096 the number of interactions in the subnetwork. As the interaction data were  
1097 standard normalized, the expected network interaction score,  $E(X)$ , is 0, and  
1098 the standard deviation of network interactions,  $\sigma(X)$ , is 1.

1099 Network *locality* assesses the proportion of significant co-expression interactions ( $z \geq 3$ ) that are  
1100 locally connected to other subnetwork genes compared to the number of global network  
1101 interactions. To quantify network locality, both local and global degree are calculated for each  
1102 gene within a subnetwork. To account for degree bias, where genes with a high global degree are  
1103 more likely to have more local interactions, a linear regression is calculated on local degree using  
1104 global degree (designated: local ~ global), and regression residuals for each gene are analyzed:

1105 Eq. 2

$$1106 \quad \text{Subnetwork Locality} = \text{mean}(\text{residual}(\text{local\_degree} \sim \text{global\_degree}))$$

1107 Gene-specific density is calculated by considering subnetwork interactions on a per-gene basis:

1108 Eq. 3

$$1109 \quad \text{Gene-Specific Density} = \frac{\sum \text{subnetwork\_interaction\_score}(\text{gene})}{\text{number\_of\_genes} - 1}$$

1110

1111 Gene locality residuals can be interpreted independently to identify gene-specific locality:

1112 Eq. 4

$$1114 \quad \text{Gene-Specific Locality} = \text{residual}(\text{local\_degree} \sim \text{global\_degree})$$

1113

1115 Interactions among genes that originate from the same effective GWAS locus (i.e., *cis*  
1116 interactions) were removed from density and locality calculations due to biases in *cis* co-  
1117 expression. During SNP-to-gene mapping, candidate genes retained information containing a

1118 reference back to the parental GWAS SNP. A software flag within Camoco allows for interactions  
1119 derived from the same parental SNP to be discarded from co-expression score calculations.

1120 Statistical significance of subnetwork density and locality was assessed by comparing subnetwork  
1121 scores to 1,000 random sets of candidate genes, conserving the number of input genes.

#### 1122 Simulating GWAS using Gene Ontology (GO) terms

1123 GO(66) annotations were downloaded for maize genes from  
1124 [http://ftp.maizesequence.org/release-4a.53/functional\\_annotations/](http://ftp.maizesequence.org/release-4a.53/functional_annotations/). Co-annotated genes  
1125 within a GO term were treated as true causal genes identified by a hypothetical GWAS. Terms  
1126 between 50 and 100 genes were included to simulate the genetic architecture of a multi-genic  
1127 trait. In each co-expression network, terms having genes with significant co-expression ( $p$ -value  
1128  $\leq 0.05$ ; density or locality) were retained for further analysis. Noise introduced by imperfect  
1129 GWAS was simulated using two different methods to decompose how noise affects significantly  
1130 co-expressed networks.

#### 1131 Missing Candidate Rate

1132 Eq. 6

$$1133 \quad MCR = 1 - \frac{\# \text{ True\_Candidate\_Genes}}{\# \text{ Candidate\_Genes}}$$

#### 1134 False Candidate Rate

1135 Eq. 7

$$1136 \quad FCR = \frac{\# \text{ Candidate\_Genes} - \# \text{ True\_Candidate\_Genes}}{\# \text{ Candidate\_Genes}}$$

1137

#### 1138 Simulating missing candidate gene rate (MCR)

1139 The effects of MCR were evaluated by subjecting GO terms with significant co-expression ( $p \leq$   
1140  $0.05$ ; described above) to varying levels of missing candidate rates. True GO term genes were  
1141 replaced with random genes at varying rates (MCR: 0%, 10%, 20%, 50%, 80%, 90%, 100%). The  
1142 effect of MCR was evaluated by assessing the number of GO terms that retained significant co-  
1143 expression (compared to 1,000 randomizations) at each level of MCR.

#### 1144 Adding false candidate genes by expanding SNP-to-gene mapping parameters

1145 To determine how false candidates due to imperfect SNP-to-gene mapping affected the ability to  
1146 detect co-expressed candidate genes linked to a GWAS trait, significantly co-expressed GO terms

1147 were reassessed after incorporating false candidate genes. Each gene in a GO term was treated as  
1148 a SNP and remapped to a set of candidate genes using the different SNP-to-gene mapping  
1149 parameters (all combinations of 50 kb 100 kb, 500 kb and one, two, or five flanking genes).  
1150 Effective FCR at each SNP-to-gene mapping parameter setting was calculated by dividing the  
1151 number of true GO genes with candidates identified after SNP-to-gene mapping. Since varying  
1152 SNP-to-gene mapping parameters changes the number of candidate genes considered within a  
1153 term, each term was considered independently for each parameter combination.

#### 1154 Maize ionome GWAS

1155 Elemental concentrations were measured for 17 different elements in the maize kernel using  
1156 inductively coupled plasma mass spectrometry (ICP-MS) as described in Ziegler et al.(43) Outliers  
1157 were removed from single-seed measurements using median absolute deviation(67). Basic linear  
1158 unbiased predictors (BLUPs) for each elemental concentration were calculated across different  
1159 environments and used to estimate variance components(68). Joint-linkage analysis was run  
1160 using TASSEL version 3.0(69) with over 7,000 SNPs obtained by genotype by sequencing  
1161 (GBS)(70). An empirical  $p$ -value cutoff was determined by performing 1,000 permutations in  
1162 which the BLUP phenotype data were shuffled within each NAM family before joint-linkage  
1163 analysis was performed. The  $p$ -value corresponding to a 5% false discovery rate was used for  
1164 inclusion of a QTL in the joint-linkage model.

1165 Genome-wide association was performed using stepwise forward regression implemented in  
1166 TASSEL version 4.0 similar to other studies(4,6,7). Briefly, genome-wide association was  
1167 performed on a chromosomal-by-chromosome basis. To account for variance explained by QTLs  
1168 on other chromosomes, the phenotypes used were the residuals from each chromosome  
1169 calculated from the joint-linkage model fit with all significant joint-linkage QTLs except those on  
1170 the given chromosome. Association analysis for each trait was performed 100 times by randomly  
1171 sampling, without replacement, 80% of the lines from each population.

1172 The final input SNP dataset contained 28.9 million SNPs obtained from the maize HapMap1(8),  
1173 the maize HapMap2(71), as well as an additional ~800,000 putative copy-number variants from  
1174 analysis of read depth counts in HapMap2(7,71). These ~30 million markers were projected onto  
1175 all 5,000 lines in the NAM population using low-density markers obtained through GBS. A cutoff  
1176  $p$ -value value ( $p \leq 1e-6$ ) was used from inclusion in the final model. SNPs associated with  
1177 elemental concentrations were considered significant if they were selected in more than 5 of the  
1178 100 models (resample model inclusion probability [RMIP])(44).

## 1179 Identifying ionome high-priority overlap (HPO) genes and HPO+ genes

1180 Gene-specific density and locality were calculated for candidate genes identified from the 17  
1181 ionome GWAS traits as well as for 1,000 random sets of genes of the same size. Gene-specific  
1182 metrics were converted to the standard normal scale (z-score) by subtracting the average gene-  
1183 specific score from the randomized set and dividing by the average randomized standard  
1184 deviation. A false discovery rate was established by incrementally evaluating the number of GWAS  
1185 candidates discovered at a z-score threshold compared to the average number discovered in the  
1186 random sets. For example, if ten GWAS genes had a gene-specific z-score of 3 and an average of  
1187 2.5 randomized genes (in the 1,000 random sets) had a score of 3 or above, the FDR would be  
1188 25%.

1189 High-priority overlap (HPO) candidate genes for each element were identified by requiring  
1190 candidate genes to have a co-expression FDR  $\leq 30\%$  in two or more SNP-to-gene mapping  
1191 scenarios in the same co-expression network using the same co-expression metric (i.e., density or  
1192 locality).

1193 HPO+ candidate gene sets were identified by taking the number of HPO genes discovered in each  
1194 element ( $n$  genes) and querying each co-expression network for the set of ( $n$ ) genes that had the  
1195 strongest aggregate co-expression. For example, of the 18 HPO genes for P, an additional 18 genes  
1196 (36 total) were added to the HPO+ set based on co-expression in each of the networks. Genes were  
1197 added based on the sum of their co-expression to the original HPO set.

## 1198 Reduced-accession ZmPAN networks

1199 Both the ZmPAN and ZmRoot networks were rebuilt using only the 20 accessions in common  
1200 between the 503 ZmPAN and 46 ZmRoot experimental datasets. The ZmPAN network was also  
1201 built using the common set of 20 accessions as well as 26 accessions selected from the broader set  
1202 of 503 to simulate the number of accessions used in the ZmRoot network. Density and locality  
1203 were assessed in these reduced-accession networks using the same approach as the full datasets.

## 1204 **Acknowledgements**

1205 We would like to thank Ben VanderSluis, Henry Ward, and Joanna Dinsmore for their helpful  
1206 comments and feedback in writing this article. We would also like to thank Abby Cabunoc-Mayes  
1207 and other members of the Mozilla Science Lab for their mentorship and help in making Camoco  
1208 a free and open scientific resource.

## 1209 **Competing Interests**

1210 The authors declare no competing interests.

## 1211 **References**

- 1212 1. McMullen MD, Kresovich S, Villeda HS, Bradbury P, Li H, Sun Q, et al. Genetic properties of the  
1213 maize nested association mapping population. *Science* [Internet]. 2009 Aug 7 [cited 2012 Oct  
1214 29];325(5941):737–40. Available from: <http://www.ncbi.nlm.nih.gov/pubmed/19661427>
- 1215 2. Buckler ES, Holland JB, Bradbury PJ, Acharya CB, Brown PJ, Browne C, et al. The genetic architecture  
1216 of maize flowering time. *Science* [Internet]. 2009 Aug 7 [cited 2012 Oct 29];325(5941):714–8.  
1217 Available from: <http://www.ncbi.nlm.nih.gov/pubmed/19661422>
- 1218 3. Peiffer JA, Romay MC, Gore MA, Flint-Garcia SA, Zhang Z, Millard MJ, et al. The Genetic  
1219 Architecture of Maize Height. *Genetics* [Internet]. 2014 Feb 10 [cited 2014 Mar 19]; Available from:  
1220 <http://www.ncbi.nlm.nih.gov/pubmed/24514905>
- 1221 4. Tian F, Bradbury PJ, Brown PJ, Hung H, Sun Q, Flint-Garcia S, et al. Genome-wide association study  
1222 of leaf architecture in the maize nested association mapping population. *Nat Genet* [Internet].  
1223 2011 Feb [cited 2012 Oct 29];43(2):159–62. Available from:  
1224 <http://www.ncbi.nlm.nih.gov/pubmed/21217756>
- 1225 5. Kump KL, Bradbury PJ, Wisser RJ, Buckler ES, Belcher AR, Oropeza-Rosas M a, et al. Genome-wide  
1226 association study of quantitative resistance to southern leaf blight in the maize nested association  
1227 mapping population. *Nat Genet* [Internet]. 2011;43(2):163–8. Available from:  
1228 <http://www.nature.com/doi/10.1038/ng.747>
- 1229 6. Cook JP, McMullen MD, Holland JB, Tian F, Bradbury P, Ross-Ibarra J, et al. Genetic architecture of  
1230 maize kernel composition in the nested association mapping and inbred association panels. *Plant*  
1231 *Physiol* [Internet]. 2012 Feb [cited 2012 Oct 5];158(2):824–34. Available from:  
1232 <http://www.ncbi.nlm.nih.gov/pubmed/22135431>
- 1233 7. Wallace JG, Bradbury PJ, Zhang N, Gibon Y, Stitt M, Buckler ES. Association mapping across  
1234 numerous traits reveals patterns of functional variation in maize. *PLoS Genet* [Internet]. 2014 Dec  
1235 4 [cited 2015 Sep 24];10(12):e1004845. Available from:  
1236 <http://journals.plos.org/plosgenetics/article?id=10.1371/journal.pgen.1004845>
- 1237 8. Gore M a, Chia J-M, Elshire RJ, Sun Q, Ersoz ES, Hurwitz BL, et al. A first-generation haplotype map  
1238 of maize. *Science* [Internet]. 2009 Nov 20 [cited 2011 Jun 10];326(5956):1115–7. Available from:  
1239 <http://www.ncbi.nlm.nih.gov/pubmed/19965431>
- 1240 9. Morrell PL, Toleno DM, Lundy KE, Clegg MT. Low levels of linkage disequilibrium in wild barley  
1241 (*Hordeum vulgare* ssp. *spontaneum*) despite high rates of self-fertilization. *Proc Natl Acad Sci U S*  
1242 *A*. 2005;102(7):2442–7.
- 1243 10. Caldwell KS, Russell J, Langridge P, Powell W. Extreme population-dependent linkage  
1244 disequilibrium detected in an inbreeding plant species, *Hordeum vulgare*. *Genetics*.  
1245 2006;172(1):557–67.
- 1246 11. Wray GA. The evolutionary significance of cis-regulatory mutations. *Nat Rev Genet* [Internet]. 2007

- 1247 Mar [cited 2014 Jul 11];8(3):206–16. Available from: <http://dx.doi.org/10.1038/nrg2063>
- 1248 12. Clark RM, Wagler TN, Quijada P, Doebley J. A distant upstream enhancer at the maize  
1249 domestication gene *tb1* has pleiotropic effects on plant and inflorescent architecture. *Nat Genet*  
1250 [Internet]. 2006 May [cited 2015 Aug 6];38(5):594–7. Available from:  
1251 <http://www.ncbi.nlm.nih.gov/pubmed/16642024>
- 1252 13. Castelletti S, Tuberosa R, Pindo M, Salvi S. A MITE transposon insertion is associated with  
1253 differential methylation at the maize flowering time QTL *Vgt1. G3* (Bethesda) [Internet]. 2014 May  
1254 [cited 2015 Sep 15];4(5):805–12. Available from:  
1255 <http://www.pubmedcentral.nih.gov/articlerender.fcgi?artid=4025479&tool=pmcentrez&rendertype=abstract>  
1256
- 1257 14. Louwers M, Bader R, Haring M, van Driel R, de Laat W, Stam M. Tissue- and expression level-specific  
1258 chromatin looping at maize *b1* epialleles. *Plant Cell* [Internet]. 2009 Mar [cited 2015 Sep  
1259 13];21(3):832–42. Available from:  
1260 <http://www.pubmedcentral.nih.gov/articlerender.fcgi?artid=2671708&tool=pmcentrez&rendertype=abstract>  
1261
- 1262 15. Andorf CM, Cannon EK, Portwood JL, Gardiner JM, Harper LC, Schaeffer ML, et al. MaizeGDB  
1263 update: new tools, data and interface for the maize model organism database. *Nucleic Acids Res*  
1264 [Internet]. 2015;gkv1007. Available from:  
1265 <http://nar.oxfordjournals.org/content/early/2015/10/01/nar.gkv1007.full>
- 1266 16. Eisen MB, Spellman PT, Brown PO, Botstein D. Cluster analysis and display of genome-wide  
1267 expression patterns. *Proc Natl Acad Sci* [Internet]. 1998 Dec 8;95(25):14863–8. Available from:  
1268 <http://www.pubmedcentral.nih.gov/articlerender.fcgi?artid=24541&tool=pmcentrez&rendertype=abstract%5Cnhttp://www.pnas.org/cgi/doi/10.1073/pnas.95.25.14863>  
1269
- 1270 17. Schaefer RJ, Briskine R, Springer NM, Myers CL. Discovering functional modules across diverse  
1271 maize transcriptomes using COB, the co-expression browser. *PLoS One*. 2014;9(6).
- 1272 18. Mochida K, Uehara-Yamaguchi Y, Yoshida T, Sakurai T, Shinozaki K. Global landscape of a co-  
1273 expressed gene network in barley and its application to gene discovery in Triticeae crops. *Plant Cell*  
1274 *Physiol* [Internet]. 2011 May [cited 2011 Aug 15];52(5):785–803. Available from:  
1275 <http://www.pubmedcentral.nih.gov/articlerender.fcgi?artid=3093127&tool=pmcentrez&rendertype=abstract>  
1276
- 1277 19. Obayashi T, Okamura Y, Ito S, Tadaka S, Aoki Y, Shirota M, et al. ATTED-II in 2014: Evaluation of  
1278 Gene Coexpression in Agriculturally Important Plants. *Plant Cell Physiol* [Internet]. 2014;55(1):e6–  
1279 e6. Available from: <http://pcp.oxfordjournals.org/cgi/doi/10.1093/pcp/pct178>
- 1280 20. Sarkar NK, Kim Y-K, Grover A. Coexpression network analysis associated with call of rice seedlings  
1281 for encountering heat stress. *Plant Mol Biol*. 2014 Jan;84(1–2):125–43.
- 1282 21. Zheng Z-L, Zhao Y. Transcriptome comparison and gene coexpression network analysis provide a  
1283 systems view of citrus response to “*Candidatus Liberibacter asiaticus*” infection. *BMC Genomics*.  
1284 2013;14(1):27.
- 1285 22. Ozaki S, Ogata Y, Suda K, Kurabayashi A, Suzuki T, Yamamoto N, et al. Coexpression analysis of  
1286 tomato genes and experimental verification of coordinated expression of genes found in a  
1287 functionally enriched coexpression module. *DNA Res* [Internet]. 2010 Apr [cited 2016 Apr

- 1288 16];17(2):105–16. Available from:  
1289 [http://www.pubmedcentral.nih.gov/articlerender.fcgi?artid=2853382&tool=pmcentrez&rendert](http://www.pubmedcentral.nih.gov/articlerender.fcgi?artid=2853382&tool=pmcentrez&rendertype=abstract)  
1290 [ype=abstract](http://www.pubmedcentral.nih.gov/articlerender.fcgi?artid=2853382&tool=pmcentrez&rendertype=abstract)
- 1291 23. Swanson-Wagner R, Briskine R, Schaefer R, Hufford MB, Ross-Ibarra J, Myers CL, et al. Reshaping  
1292 of the maize transcriptome by domestication. PNAS [Internet]. 2012 Jul 17 [cited 2016 Jun  
1293 7];109(29):11878–83. Available from: <http://www.pnas.org/cgi/doi/10.1073/pnas.1201961109>
- 1294 24. Wolfe CJ, Kohane IS, Butte AJ. Systematic survey reveals general applicability of “guilt-by-  
1295 association” within gene coexpression networks. BMC Bioinformatics [Internet]. 2005 Jan [cited  
1296 2016 Apr 8];6:227. Available from:  
1297 [http://www.pubmedcentral.nih.gov/articlerender.fcgi?artid=1239911&tool=pmcentrez&rendert](http://www.pubmedcentral.nih.gov/articlerender.fcgi?artid=1239911&tool=pmcentrez&rendertype=abstract)  
1298 [ype=abstract](http://www.pubmedcentral.nih.gov/articlerender.fcgi?artid=1239911&tool=pmcentrez&rendertype=abstract)
- 1299 25. Ritchie MD, Holzinger ER, Li R, Pendergrass SA, Kim D. Methods of integrating data to uncover  
1300 genotype–phenotype interactions. Nat Rev Genet [Internet]. 2015 Jan 13;16(2):85–97. Available  
1301 from: <http://dx.doi.org/10.1038/nrg3868>
- 1302 26. Li M, Chen J, Wang J, Hu B, Chen G. Modifying the DPCLUS algorithm for identifying protein  
1303 complexes based on new topological structures. BMC Bioinformatics [Internet]. 2008 Jan 25 [cited  
1304 2016 Apr 28];9(1):398. Available from:  
1305 <http://bmcbioinformatics.biomedcentral.com/articles/10.1186/1471-2105-9-398>
- 1306 27. Calabrese GM, Mesner LD, Stains JP, Tommasini SM, Horowitz MC, Rosen CJ, et al. Integrating  
1307 GWAS and Co-expression Network Data Identifies Bone Mineral Density Genes SPTBN1 and MARK3  
1308 and an Osteoblast Functional Module. Cell Syst [Internet]. 2017;4(1):46–59.e4. Available from:  
1309 <http://dx.doi.org/10.1016/j.cels.2016.10.014>
- 1310 28. Bunyavanich S, Schadt EE, Himes BE, Lasky-Su J, Qiu W, Lazarus R, et al. Integrated genome-wide  
1311 association, coexpression network, and expression single nucleotide polymorphism analysis  
1312 identifies novel pathway in allergic rhinitis. BMC Med Genomics [Internet]. 2014;7(1):48. Available  
1313 from: <http://bmcmmedgenomics.biomedcentral.com/articles/10.1186/1755-8794-7-48>
- 1314 29. Taşan M, Musso G, Hao T, Vidal M, Macrae C a, Roth FP. Selecting causal genes from genome-wide  
1315 association studies via functionally coherent subnetworks. 2014;12(2).
- 1316 30. USDA. Crop Production 2015 Summary. 2016.
- 1317 31. Baxter I. Ionomics: The functional genomics of elements. Brief Funct Genomics [Internet]. 2010  
1318 Mar [cited 2012 Oct 29];9(2):149–56. Available from:  
1319 <http://www.ncbi.nlm.nih.gov/pubmed/20081216>
- 1320 32. Guerinot M Lou, Salt DE. Fortified Foods and Phytoremediation . Two Sides of the Same Coin 1.  
1321 2017;3755.
- 1322 33. Baxter IR, Vitek O, Lahner B, Muthukumar B, Borghi M, Morrissey J, et al. The leaf ionome as a  
1323 multivariable system to detect a plant’s physiological status. Proc Natl Acad Sci U S A [Internet].  
1324 2008 Aug 19 [cited 2015 Oct 2];105(33):12081–6. Available from:  
1325 <http://www.pnas.org/content/105/33/12081.abstract>
- 1326 34. Schaefer RJ, Briskine R, Springer NM, Myers CL. Discovering functional modules across diverse  
1327 maize transcriptomes using COB, the co-expression browser. PLoS One. 2014;9(6):99193.

- 1328 35. Swanson-Wagner R, Briskine R, Schaefer R, Hufford MB, Ross-Ibarra J, Myers CL, et al. Reshaping  
1329 of the maize transcriptome by domestication. *Proc Natl Acad Sci U S A*. 2012;109(29).
- 1330 36. Schaefer RJ, Michno J-M, Myers CL. Unraveling gene function in agricultural species using gene co-  
1331 expression networks. *Biochim Biophys Acta - Gene Regul Mech*. 2016;
- 1332 37. Hirsch CN, Foerster JM, Johnson JM, Sekhon RS, Muttoni G, Vaillancourt B, et al. Insights into the  
1333 maize pan-genome and pan-transcriptome. *Plant Cell [Internet]*. 2014 Jan 31 [cited 2014 Jul  
1334 14];26(1):121–35. Available from:  
1335 <http://www.plantcell.org/content/early/2014/01/31/tpc.113.119982.abstract>
- 1336 38. Stelpflug SC, Rajandeeep S, Vaillancourt B, Hirsch CN, Buell CR, Leon N De, et al. An expanded maize  
1337 gene expression atlas based on RNA-sequencing and its use to explore root development. *Plant*  
1338 *Genome*. 2015;(608):314–62.
- 1339 39. Schaefer RJ, Briskine R, Springer NM, Myers CCL, Wei H, Persson S, et al. Discovering functional  
1340 modules across diverse maize transcriptomes using COB, the co-expression browser. Börnke F,  
1341 editor. *PLoS One [Internet]*. 2014 Jun 12 [cited 2016 Jun 7];9(6):99193. Available from:  
1342 <http://dx.plos.org/10.1371/journal.pone.0099193>
- 1343 40. Dongen S van. MCL: A Cluster Algorithm for Graphs. Center for Information Workshop; 2000.
- 1344 41. Ghazalpour A, Doss S, Zhang B, Wang S, Plaisier C, Castellanos R, et al. Integrating genetic and  
1345 network analysis to characterize genes related to mouse weight. Gibson G, editor. *PLoS Genet*  
1346 *[Internet]*. 2006 Aug 18 [cited 2014 Apr 29];2(8):e130. Available from:  
1347 <http://dx.plos.org/10.1371/journal.pgen.0020130>
- 1348 42. Baxter I, Dilkes BP. Elemental profiles reflect plant adaptations to the environment. *Science*  
1349 *[Internet]*. 2012 Jun 29 [cited 2015 Oct 4];336(6089):1661–3. Available from:  
1350 <http://www.sciencemag.org/content/336/6089/1661.abstract>
- 1351 43. Ziegler G, Kear PJ, Wu D, Ziyomo C, Lipka AE, Gore M, et al. Elemental Accumulation in Kernels of  
1352 the Maize Nested Association Mapping Panel Reveals Signals of Gene by Environment Interactions.  
1353 *bioRxiv*. 2017;(May).
- 1354 44. Valdar W, Holmes CC, Mott R, Flint J. Mapping in structured populations by resample model  
1355 averaging. *Genetics [Internet]*. 2009 Aug 1 [cited 2015 Aug 6];182(4):1263–77. Available from:  
1356 <http://www.genetics.org/content/182/4/1263.long>
- 1357 45. Chao D-Y, Gable K, Chen M, Baxter I, Dietrich CR, Cahoon EB, et al. Sphingolipids in the Root Play  
1358 an Important Role in Regulating the Leaf Ionome in *Arabidopsis thaliana*. *Plant Cell [Internet]*.  
1359 2011;23(3):1061–81. Available from: <http://www.plantcell.org/cgi/doi/10.1105/tpc.110.079095>
- 1360 46. Fan J, Zhai Z, Yan C, Xu C. *Arabidopsis* TRIGALACTOSYLDIACYLGLYCEROL5 Interacts with TGD1,  
1361 TGD2, and TGD4 to Facilitate Lipid Transfer from the Endoplasmic Reticulum to Plastids. *Plant Cell*  
1362 *[Internet]*. 2015;27(October):tpc.15.00394. Available from:  
1363 <http://www.plantcell.org/lookup/doi/10.1105/tpc.15.00394>
- 1364 47. Katagiri T, Ishiyama K, Kato T, Tabata S, Kobayashi M, Shinozaki K. An important role of  
1365 phosphatidic acid in ABA signaling during germination in *Arabidopsis thaliana*. *Plant J*.  
1366 2005;43(1):107–17.
- 1367 48. Roston RL, Gao J, Murcha MW, Whelan J, Benning C. TGD1, -2, and -3 proteins involved in lipid



- 1368 trafficking form ATP-binding cassette (ABC) transporter with multiple substrate-binding proteins. J  
1369 Biol Chem. 2012;287(25):21406–15.
- 1370 49. Lawrence CJ, Dong Q, Polacco ML, Seigfried TE, Brendel V. MaizeGDB, the community database for  
1371 maize genetics and genomics. Nucleic Acids Res [Internet]. 2004 Jan 1 [cited 2012 Oct  
1372 30];32(Database issue):D393-7. Available from:  
1373 <http://www.pubmedcentral.nih.gov/articlerender.fcgi?artid=308746&tool=pmcentrez&rendertype=abstract>  
1374
- 1375 50. Winkler RG, Freeling M. Physiological genetics of the dominant gibberellin-nonresponsive maize  
1376 dwarfs, Dwarf8 and Dwarf9. Planta. 1994;193:341–8.
- 1377 51. Lawit SJ, Wych HM, Xu D, Kundu S, Tomes DT. Maize DELLA proteins dwarf plant8 and dwarf plant9  
1378 as modulators of plant development. Plant Cell Physiol. 2010;51(11):1854–68.
- 1379 52. Fu J, Ren F, Lu X, Mao H, Xu M, Degenhardt J, et al. A Tandem Array of *ent*-Kaurene Synthases in  
1380 Maize with Roles in Gibberellin and More Specialized Metabolism. Plant Physiol [Internet].  
1381 2016;170(2):742–51. Available from:  
1382 <http://www.plantphysiol.org/lookup/doi/10.1104/pp.15.01727>
- 1383 53. Wang X, Elling AA, Li X, Li N, Peng Z, He G, et al. Genome-Wide and Organ-Specific Landscapes of  
1384 Epigenetic Modifications and Their Relationships to mRNA and Small RNA Transcriptomes in Maize.  
1385 Plant Cell Online [Internet]. 2009;21(4):1053–69. Available from:  
1386 <http://www.plantcell.org/cgi/doi/10.1105/tpc.109.065714>
- 1387 54. Asaro A, Ziegler G, Ziyomo C, Hoekenga O, Dilkes B, Baxter I. The Interaction of Genotype and  
1388 Environment Determines Variation in the Maize Kernel Ionome. G3&#58;  
1389 Genes|Genomes|Genetics [Internet]. 2016;6(December):4175–83. Available from:  
1390 <http://g3journal.org/cgi/doi/10.1534/g3.116.034827>
- 1391 55. Wild M, Davi??re JM, Regnault T, Sakvarelidze-Achard L, Carrera E, Lopez Diaz I, et al. Tissue-  
1392 Specific Regulation of Gibberellin Signaling Fine-Tunes Arabidopsis Iron-Deficiency Responses. Dev  
1393 Cell. 2016;37(2):190–200.
- 1394 56. Monaco MK, Sen TZ, Dharmawardhana PD, Ren L, Schaeffer M, Naithani S, et al. Maize Metabolic  
1395 Network Construction and Transcriptome Analysis. Plant Genome [Internet]. 2013;6(1):0.  
1396 Available from:  
1397 <https://www.crops.org/publications/tpg/abstracts/6/1/plantgenome2012.09.0025>
- 1398 57. Baxter IR, Ziegler G, Lahner B, Mickelbart M V., Foley R, Danku J, et al. Single-kernel ionic profiles  
1399 are highly heritable indicators of genetic and environmental influences on elemental accumulation  
1400 in maize grain (*Zea mays*). PLoS One. 2014;9(1).
- 1401 58. Baxter I, Tchieu J, Sussman MR, Boutry M, Palmgren MG, Gribskov M, et al. Genomic Comparison  
1402 of P-Type ATPase Ion Pumps in Arabidopsis and Rice 1. 2003;132(June):618–28.
- 1403 59. Badri D V., Loyola-Vargas VM, Broeckling CD, De-la-Pena C, Jasinski M, Santelia D, et al. Altered  
1404 Profile of Secondary Metabolites in the Root Exudates of Arabidopsis ATP-Binding Cassette  
1405 Transporter Mutants. Plant Physiol [Internet]. 2007;146(2):762–71. Available from:  
1406 <http://www.plantphysiol.org/cgi/doi/10.1104/pp.107.109587>
- 1407 60. Tacke E, Korfhage C, Michel D, Maddaloni M, Motto M, Lanzini S, et al. Transposon tagging of the  
1408 maize Glossy2 locus with the transposable element En/Spm. Vol. 8, The Plant Journal. 1995. p.

- 1409 907–17.
- 1410 61. Mason MG, Jha D, Salt DE, Tester M, Hill K, Kieber JJ, et al. Type-B response regulators ARR1 and  
1411 ARR12 regulate expression of *AtHKT1;1* and accumulation of sodium in *Arabidopsis* shoots. *Plant*  
1412 *J.* 2010;64(5):753–63.
- 1413 62. Lindgreen S. AdapterRemoval: easy cleaning of next-generation sequencing reads. *BMC Res Notes*  
1414 [Internet]. 2012 Jan [cited 2015 Sep 4];5(1):337. Available from:  
1415 <http://www.biomedcentral.com/1756-0500/5/337>
- 1416 63. Li H, Durbin R. Fast and accurate short read alignment with Burrows-Wheeler transform.  
1417 *Bioinformatics* [Internet]. 2009 Jul 15 [cited 2014 Jul 9];25(14):1754–60. Available from:  
1418 <http://www.pubmedcentral.nih.gov/articlerender.fcgi?artid=2705234&tool=pmcentrez&rendertype=abstract>  
1419
- 1420 64. Schubert M, Ermini L, Der Sarkissian C, Jónsson H, Ginolhac A, Schaefer R, et al. Characterization of  
1421 ancient and modern genomes by SNP detection and phylogenomic and metagenomic analysis  
1422 using PALEOMIX. *Nat Protoc* [Internet]. 2014;9(5):1056–82. Available from:  
1423 <http://www.ncbi.nlm.nih.gov/pubmed/24722405>
- 1424 65. Anders S, Pyl PT, Huber W. HTSeq - A Python framework to work with high-throughput sequencing  
1425 data. *Bioinformatics* [Internet]. 2014 Sep 25 [cited 2014 Sep 29];31(2):166–9. Available from:  
1426 <http://bioinformatics.oxfordjournals.org/content/31/2/166>
- 1427 66. Harris M a, Clark J, Ireland a, Lomax J, Ashburner M, Foulger R, et al. The Gene Ontology (GO)  
1428 database and informatics resource. *Nucleic Acids Res* [Internet]. 2004 Jan 1 [cited 2012 Oct  
1429 10];32(Database issue):D258–61. Available from:  
1430 <http://www.pubmedcentral.nih.gov/articlerender.fcgi?artid=308770&tool=pmcentrez&rendertype=abstract>  
1431
- 1432 67. Davies L, Gather U. The Identification of Multiple Outliers. *J Am Stat Assoc* [Internet]. 2012 Feb 27  
1433 [cited 2015 Nov 20]; Available from:  
1434 <http://www.tandfonline.com/doi/abs/10.1080/01621459.1993.10476339>
- 1435 68. Hung H-Y, Browne C, Guill K, Coles N, Eller M, Garcia A, et al. The relationship between parental  
1436 genetic or phenotypic divergence and progeny variation in the maize nested association mapping  
1437 population. *Heredity* (Edinb) [Internet]. 2012 May [cited 2015 Nov 20];108(5):490–9. Available  
1438 from:  
1439 <http://www.pubmedcentral.nih.gov/articlerender.fcgi?artid=3330692&tool=pmcentrez&rendertype=abstract>  
1440
- 1441 69. Bradbury PJ, Zhang Z, Kroon DE, Casstevens TM, Ramdoss Y, Buckler ES. TASSEL: software for  
1442 association mapping of complex traits in diverse samples. *Bioinformatics* [Internet]. 2007 Oct 1  
1443 [cited 2014 Jul 12];23(19):2633–5. Available from:  
1444 <http://www.ncbi.nlm.nih.gov/pubmed/17586829>
- 1445 70. Elshire RJ, Glaubitz JC, Sun Q, Poland JA, Kawamoto K, Buckler ES, et al. A robust, simple  
1446 genotyping-by-sequencing (GBS) approach for high diversity species. *PLoS One* [Internet]. 2011 Jan  
1447 [cited 2014 Jul 9];6(5):e19379. Available from:  
1448 <http://www.pubmedcentral.nih.gov/articlerender.fcgi?artid=3087801&tool=pmcentrez&rendertype=abstract>  
1449

1450 71. Chia J-M, Song C, Bradbury PJ, Costich D, de Leon N, Doebley J, et al. Maize HapMap2 identifies  
1451 extant variation from a genome in flux. Nat Genet [Internet]. 2012 Jul [cited 2012 Oct 9];44(7):803–  
1452 7. Available from: <http://www.ncbi.nlm.nih.gov/pubmed/22660545>

1453

## 1454 Supplementary Figures

1455 Supp. Fig. 1

# ZmPAN Network Stats

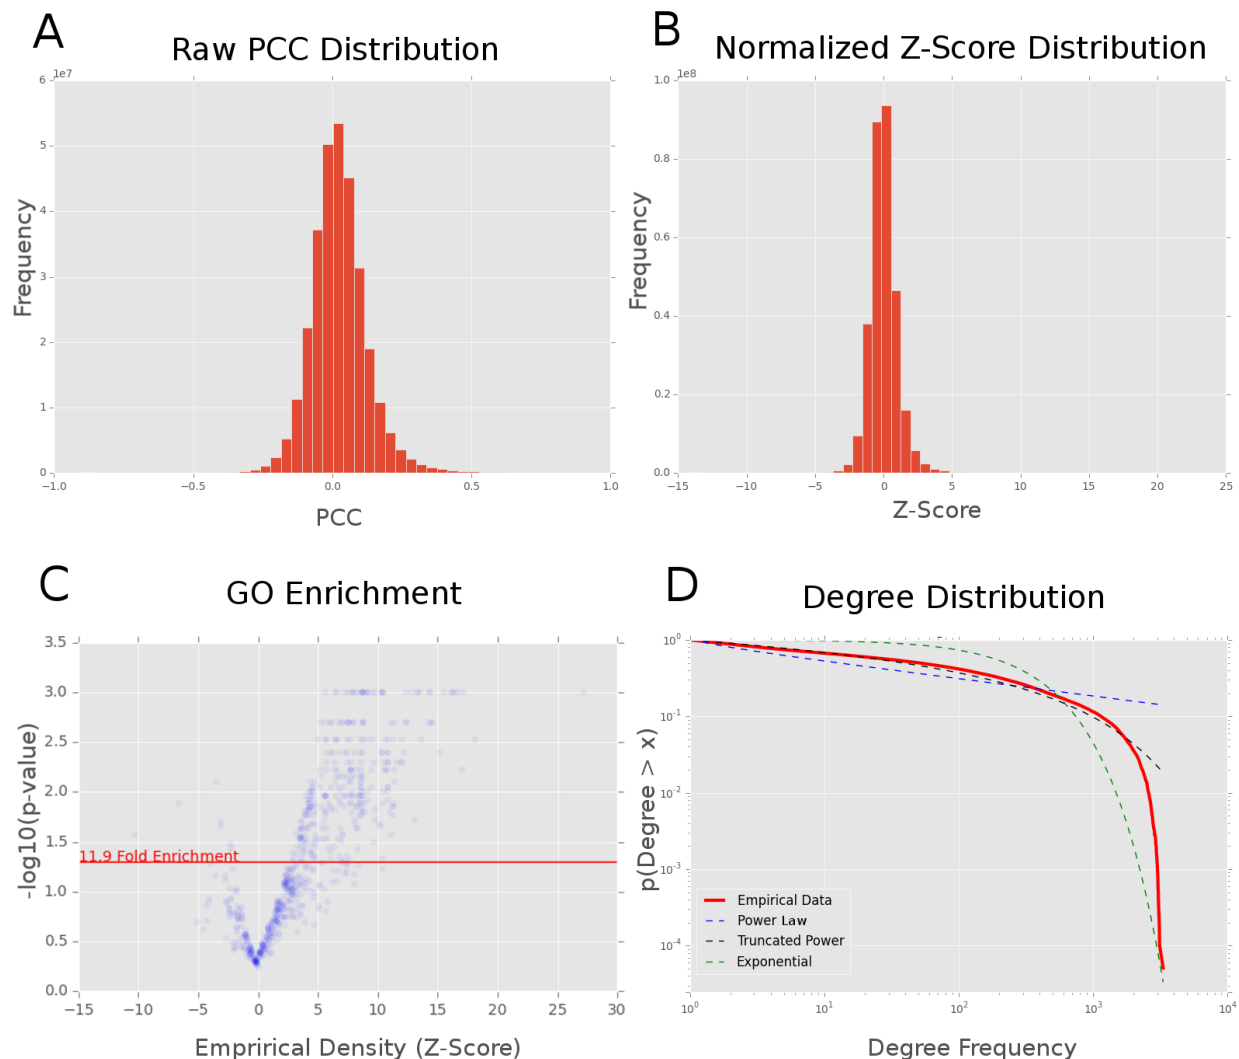

1456

1457 ZmPAN network health

1458 Global network health of the maize PAN genome (ZmPAN) co-expression  
1459 network. **(A)** Raw Pearson correlation coefficient distribution of all co-

1460 expression interactions. **(B)** Fisher-transformed, variance-stabilized, and  
1461 mean centered network interactions. **(C)** A volcano plot showing empirical  
1462 density for genes in each GO term compared to the corresponding  $p$ -value  
1463 derived from measuring density in 1,000 random gene sets of the same size.  
1464 **(D)** Degree distribution of ZmPAN genome co-expression network compared  
1465 to power law, exponential, and truncated power law distributions.

1466 Supp. Fig. 2

## ZmSAM Network Stats

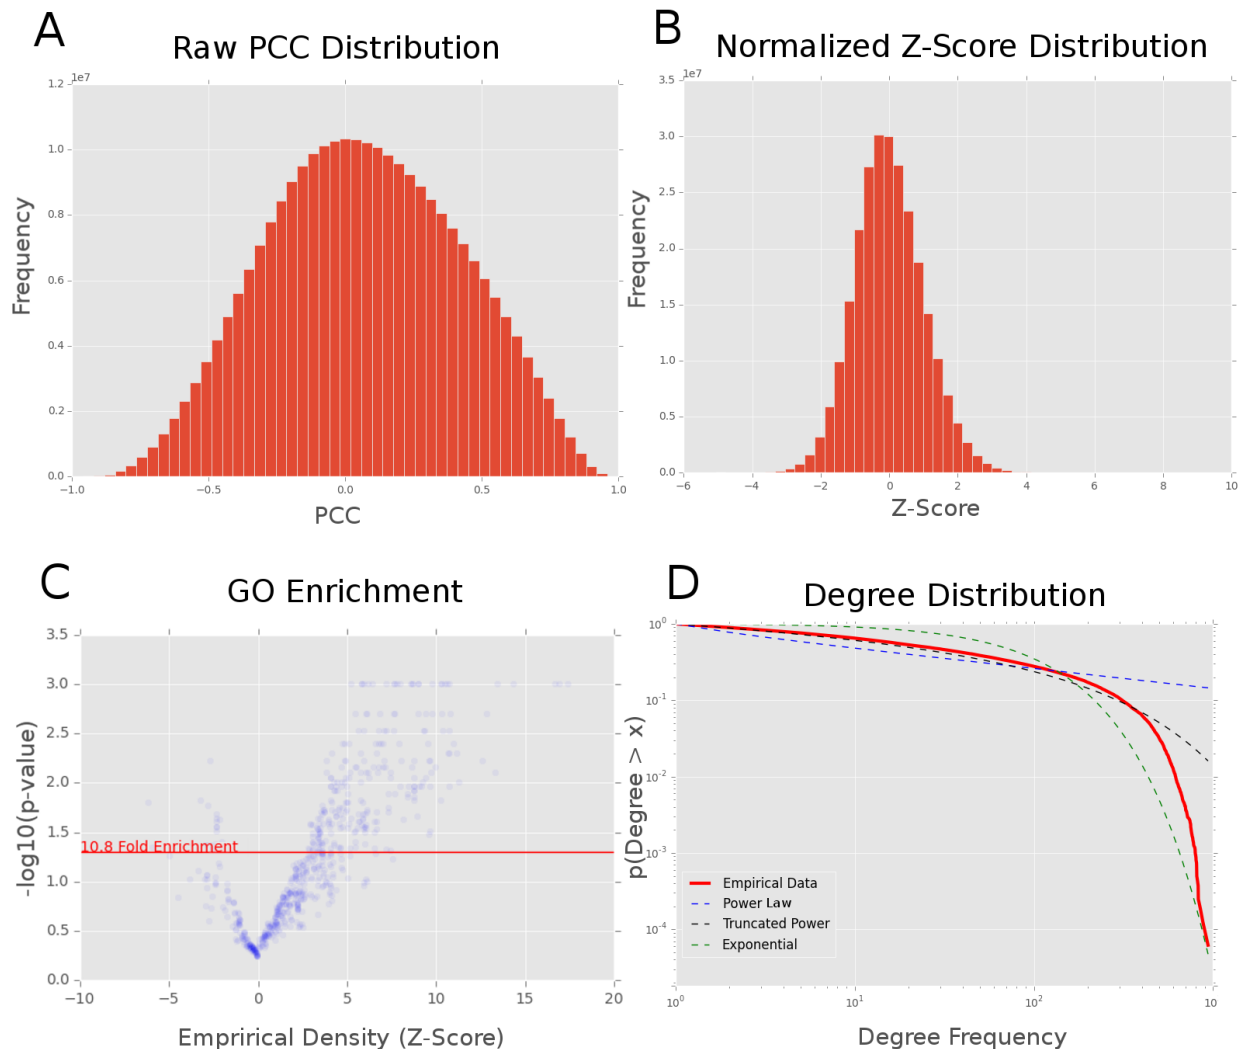

1467

1468 ZmSAM network health

1469 Global network health of the maize ZmSAM co-expression network. **(A)** Raw  
1470 Pearson correlation coefficient distribution of all co-expression interactions.

1471 **(B)** Variance-stabilized and mean centered network interactions. **(C)** A  
1472 volcano plot showing empirical density for genes in each GO term compared  
1473 to the corresponding  $p$ -value derived from measuring density in 1,000 random  
1474 gene sets of the same size. **(D)** Degree distribution of tissue/developmental  
1475 co-expression network compared to power law, exponential, and truncated  
1476 power law distributions.

1477

1478 Supp. Fig. 3

## ZmRoot Network Stats

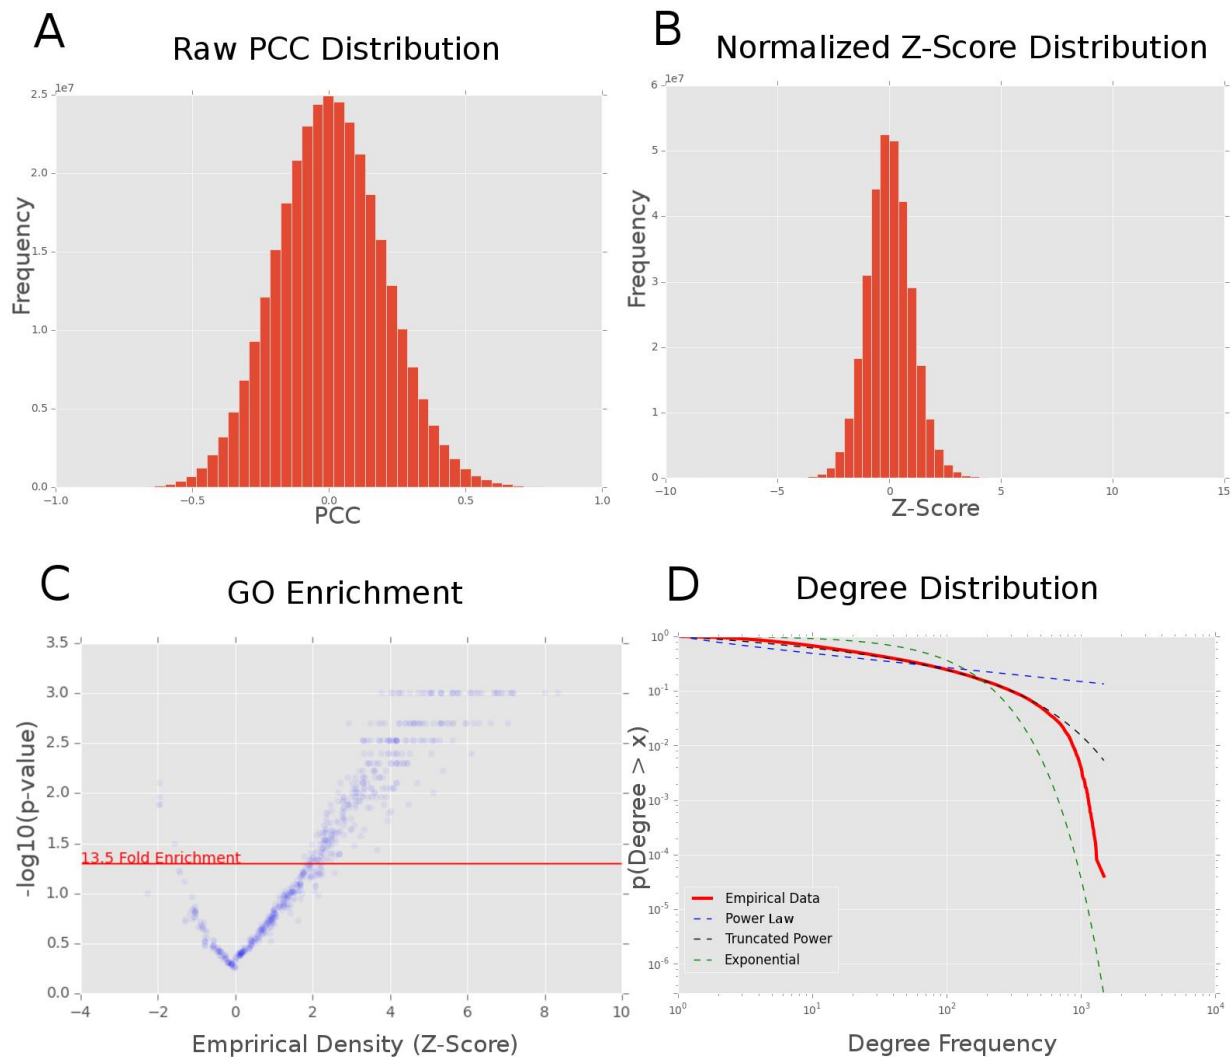

1479

1480 ZmRoot network health

1481 Global network health of the maize ZmRoot co-expression network. **(A)** Raw  
1482 Pearson correlation coefficient distribution of all co-expression interactions.  
1483 **(B)** Variance-stabilized and mean centered network interactions. **(C)** A  
1484 volcano plot showing empirical density for genes in each GO term compared  
1485 to the corresponding  $p$ -value derived from measuring density in 1,000 random  
1486 gene sets of the same size. **(D)** Degree distribution of ZmRoot co-expression  
1487 network compared to power law, exponential, and truncated power law  
1488 distributions.

1489

1490 Supp. Fig. 4

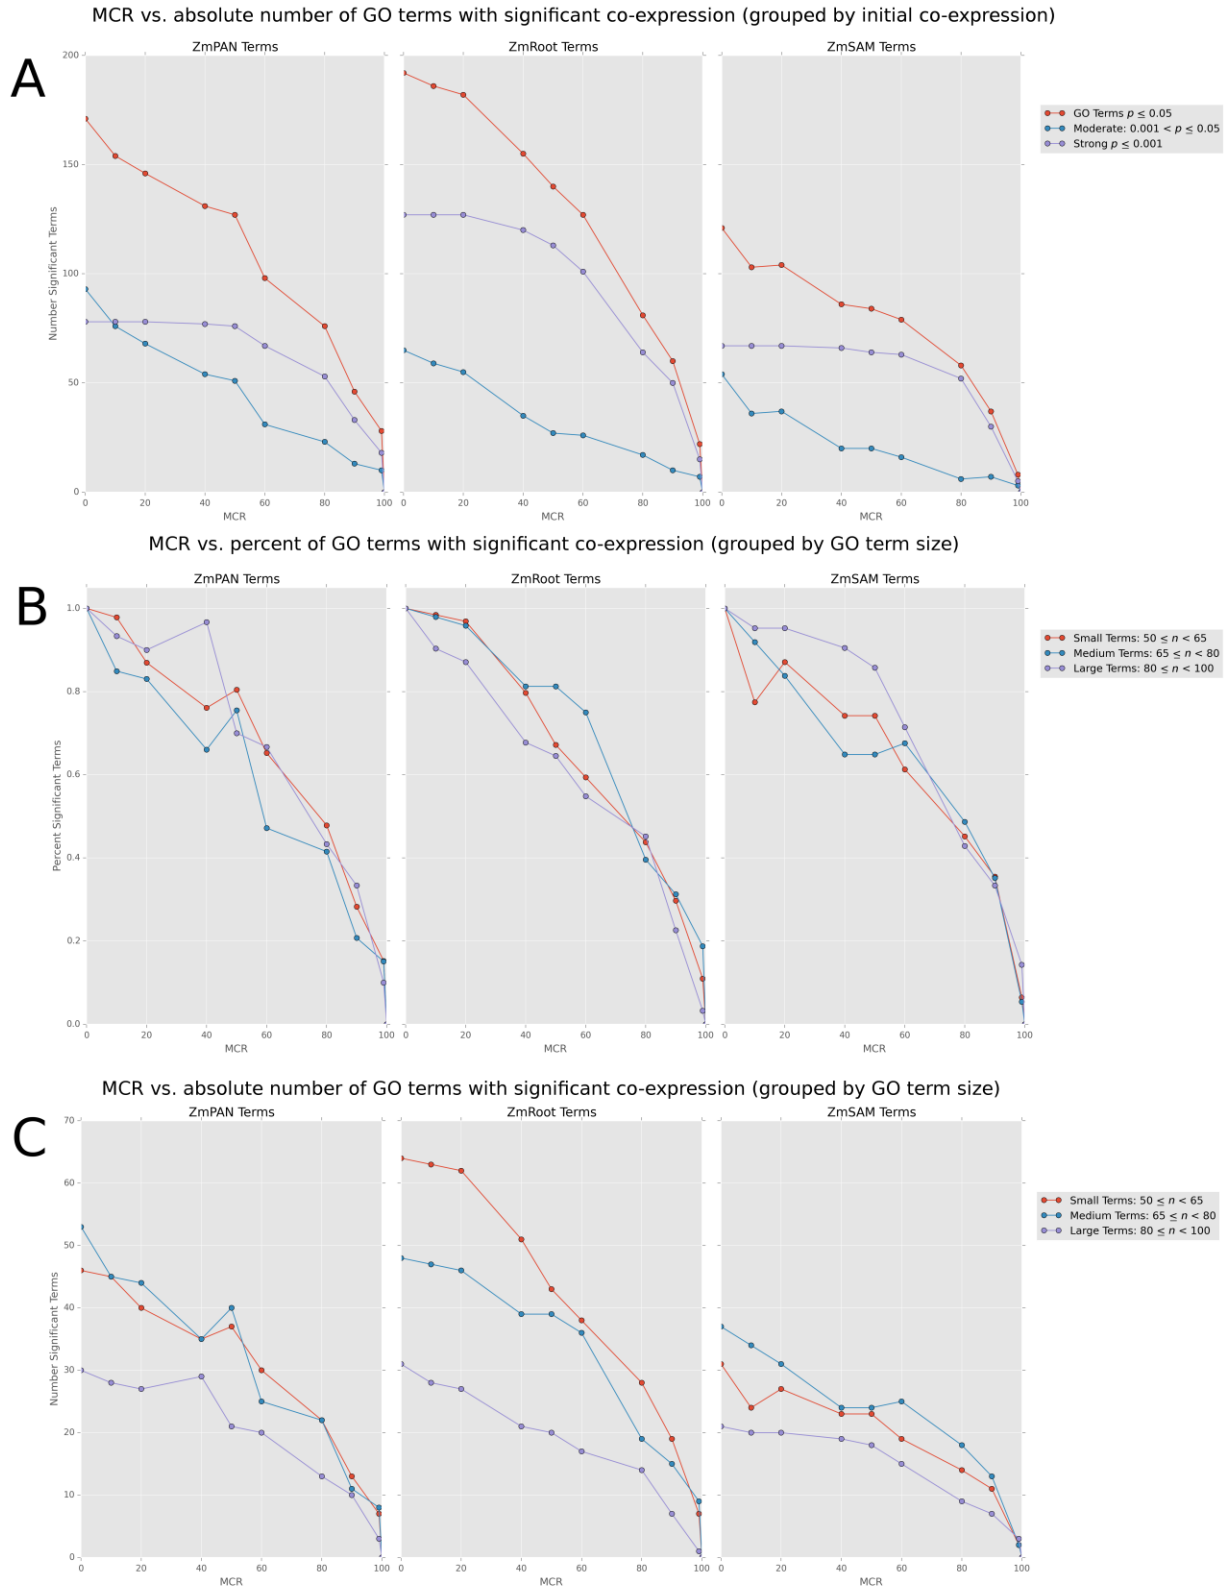

1491

1492 MCR supplemental figure

1493 Panel **(A)** shows the absolute number of GO terms that remain significantly  
1494 co-expressed at varying levels of MCR in each network. Red curves show all  
1495 GO terms with an initial co-expression  $p$ -value  $\leq 0.05$ . Blue and violet curves  
1496 show GO terms with either moderate or strong initial co-expression (at MCR  
1497 = 0). Panels **(B-C)** show the percent and absolute number of GO terms that  
1498 remain significantly co-expressed at varying levels of MCR. The red curves  
1499 show small GO terms ( $50 \leq n < 65$ ), the blue curves show medium sized GO  
1500 terms ( $65 \leq n < 80$ ), and the violet curves show large terms ( $80 \leq n < 100$ ).



1501 Supp. Fig. 5

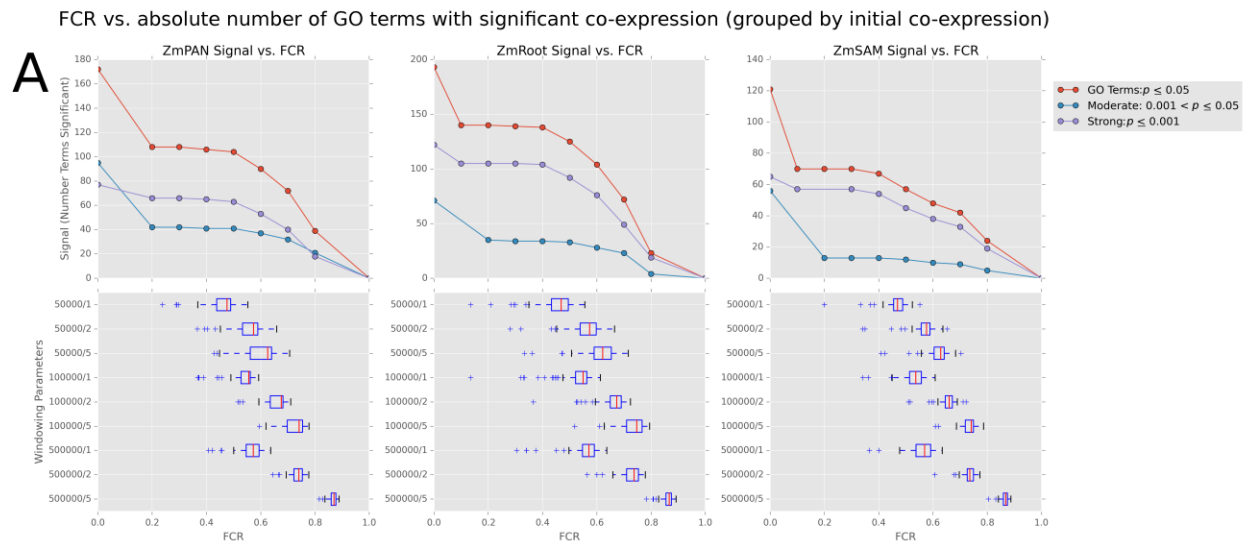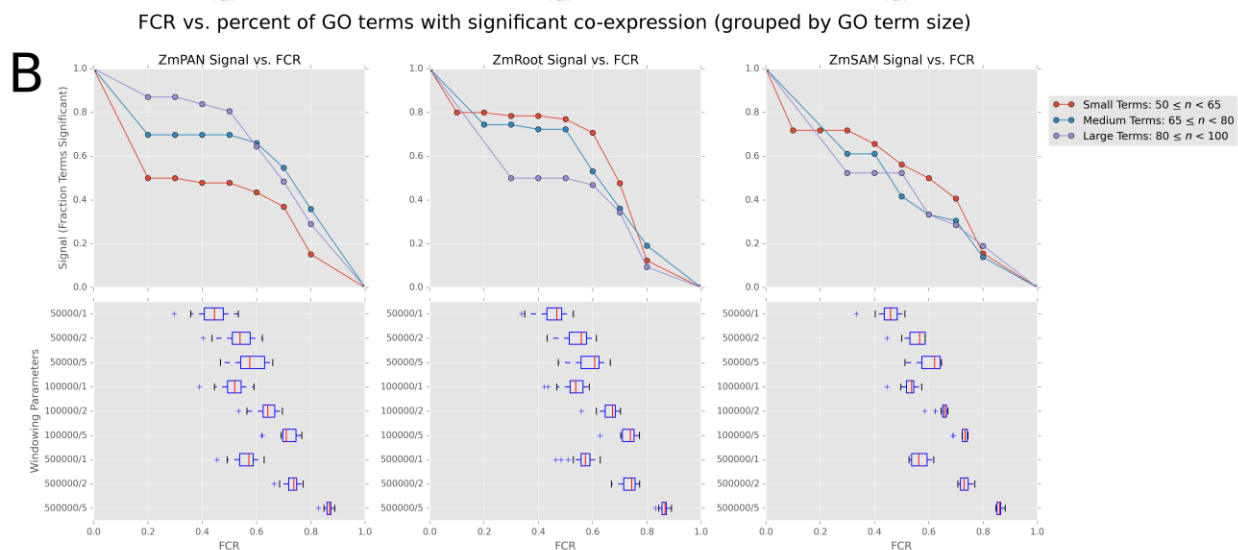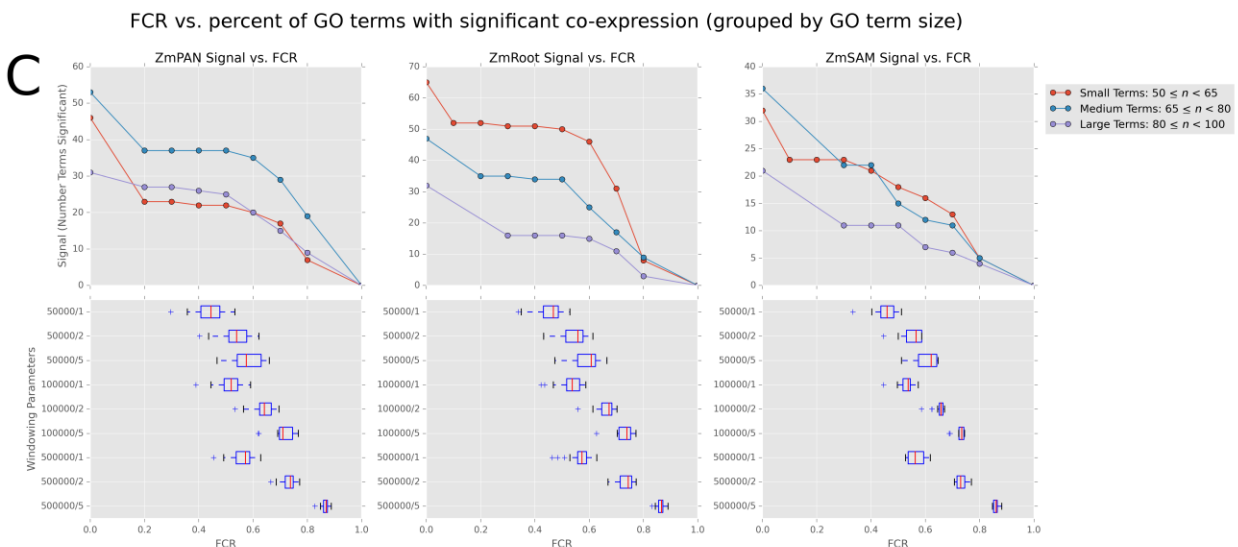

1503 FCR supplemental figure

1504 Panel **(A)** shows the absolute number of GO terms that remain significantly  
1505 co-expressed at varying levels of FCR in each network. Red curves show all  
1506 GO terms with an initial co-expression  $p$ -value  $\leq 0.05$ . Blue and violet curves  
1507 show GO terms with either moderate or strong initial co-expression. Panels  
1508 **(B-C)** show the percent and absolute number of GO terms that remain  
1509 significantly co-expressed at varying levels of FCR. The red curves show  
1510 small GO terms ( $50 \leq n < 65$ ), the blue curves show medium sized GO terms  
1511 ( $65 \leq n < 80$ ) and the violet curves show large terms ( $80 \leq n < 100$ ).

1512 Supp. Figure 6

### Correlation distributions of gene-specific density vs. locality

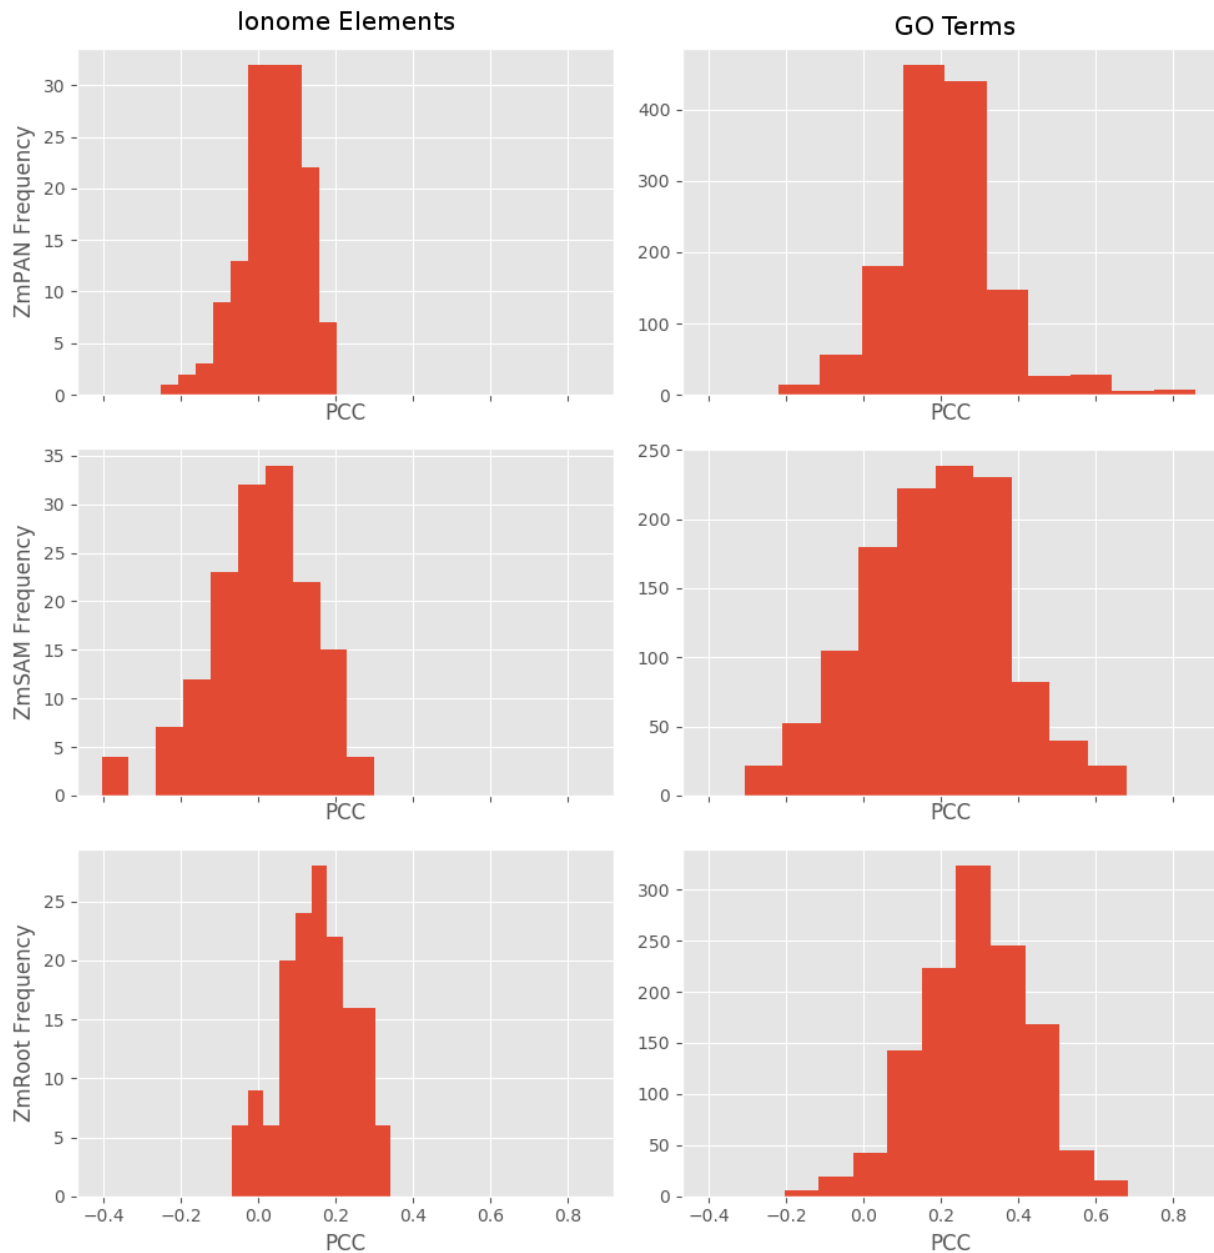

1513

1514 Distribution of Pearson correlation coefficients between gene-specific density and locality

1515 Pearson correlation was measured between gene-specific density and locality  
1516 in each network for both ionome elements and GO terms. PCCs between  
1517 metrics were calculated by grouping sets of genes in either ionome elements  
1518 (e.g., Al, Fe) or GO terms at the same SNP-to-gene mapping parameters (50-  
1519 , 100-, and 500-kb window size and one, two, and five gene flank limits). The

1520 distribution shows the PCCs between the metrics aggregated across all SNP-  
1521 to-gene mapping parameters.

## 1522 **Supplementary Tables**

1523 Supp. Table 1

1524 Full gene ontology term density and locality  $p$ -values

1525 Density and locality scores were measured between genes within each GO  
1526 term. Subnetwork  $p$ -values were generated for both density and locality by  
1527 comparing each term's metric to 1,000 randomized gene sets of the same  
1528 size.

1529 Supp. Table 2

1530 Network MCL cluster gene assignments

1531 Clusters in all three networks were identified using the MCL algorithm. Genes  
1532 in each network were assigned to cluster IDs. Lower cluster IDs have a larger  
1533 number of genes.

1534 Supp. Table 3

1535 Network MCL cluster GO enrichment

1536 Enrichment of genes co-annotated for GO terms in each MCL cluster.  
1537 Significance of enrichment was calculated using the hypergeometric test  
1538 with a Bonferroni corrected  $p$ -value of  $\leq 0.05$ .

1539 Supp. Table 4

1540 Network signal of GO terms with various levels of MCR/FCR

1541 Co-expression among genes co-annotated to GO terms was compared to  
1542 random gene sets of the same size to generate  $p$ -values. Noise was  
1543 introduced by varying the missing candidate rate (MCR) or false candidate  
1544 rate (FCR). Missing candidates were removed in proportion to the values in  
1545 the table, while false candidates were introduced using SNP-to-gene mapping  
1546 values (see WindowSize and FlankLimit columns). FCR values are reported  
1547 as averages across 10% quantiles (see Figure 5).

1548 Supp. Table 5

1549 Maize grain ionome GWAS network overlap candidate genes

1550 Candidate genes were identified in each co-expression network (ZmSAM,  
1551 ZmPAN, or ZmRoot) using SNP-to-gene mapping for each element (using  
1552 WindowSize and FlankLimit). Co-expression (density or locality) among all  
1553 genes within a subnetwork was compared to randomized gene sets of the  
1554 same size to establish  $p$ -values. Gene-specific z-scores were computed by  
1555 comparing the empirical gene-specific density (Eq. 3) or locality (Eq. 4) to the  
1556 average density or locality observed in randomized gene sets, then correcting  
1557 for standard deviation. False discovery rates (FDRs) were calculated for  
1558 candidate genes with positive gene-specific co-expression values by  
1559 comparing the number of genes discovered at a z-score cutoff to the average  
1560 number of genes discovered in randomized sets.

1561 Supp. Table 6

1562 Maize grain ionome GWAS high-priority overlap (HPO) candidate genes

1563 High-priority overlap (HPO) genes were identified by calculating gene-specific  
1564 density or locality (Method column) for each element at different SNP-to-gene  
1565 mapping parameters (see WindowSize and FlankLimit columns). At an FDR  
1566 cutoff of 30%, genes were defined as HPO if they were observed at two or  
1567 more SNP-to-gene mapping parameters.

1568 Supp. Table 7

1569 HPO genes discovered with networks built from accessions subsets

1570 The number of HPO genes discovered in full ZmPAN (503 accessions) and  
1571 ZmRoot (46 accessions) networks was compared to networks built with a  
1572 subset of accessions. Both ZmPAN and ZmRoot networks were re-built using  
1573 a common set of 20 accessions. The ZmPAN network was re-built using 46  
1574 accessions consisting of the 20 common accessions and either 26 random or  
1575 26 CML biased accessions to simulate the number used in the full 46  
1576 accession ZmRoot network. Each network was analyzed for HPO genes in the  
1577 17 GWAS elements.

1578 Supp. Table 8

1579 Multiple element HPO gene list

1580 The number of commonly discovered HPO genes, hypergeometric  $p$ -values of  
1581 set overlap, and GRMZM IDs across multiple elements.

1582 Supp. Table 9

1583 Element gene ontology enrichment

1584 HPO genes for each element were tested for enrichment among genes co-  
1585 annotated for gene ontology (GO) terms (hypergeometric test). Bonferroni  
1586 correction is included as a column, treating each GO term as an independent  
1587 test.

1588 Supp. Table 10

1589 HPO plus neighbors gene ontology enrichment

1590 Elemental HPO gene sets were supplemented with an additional set of highly  
1591 connected neighbors equal to the number of genes in the HPO set. These  
1592 HPO+ gene sets were tested for enrichment among genes annotated for GO  
1593 terms (hypergeometric test).

1594
